# Supplementary material
Source: PubMed Central journal article supplement (PMC5895503)

**Supplementary Table 1** Kinome Library Screen Data indicating transcriptional activity of SRC-3 upon knockdown of respective kinases from three different sets of siRNA.

| Gene ID | Gene Symbol | Name                                                                               | Set A | Set B | Set C |
|---------|-------------|------------------------------------------------------------------------------------|-------|-------|-------|
| 25      | ABL1        | v-abl Abelson murine leukemia viral oncogene homolog 1                             | 1.225 | 1.689 | 1.593 |
| 27      | ABL2        | v-abl Abelson murine leukemia viral oncogene homolog 2 (arg, Abelson-related gene) | 1.159 | 1.432 | 1.025 |
| 90      | ACVR1       | activin A receptor, type I                                                         | 1.152 | 1.584 | 1.223 |
| 91      | ACVR1B      | activin A receptor, type IB                                                        | 0.867 | 1.949 | 1.192 |
| 92      | ACVR2       | activin A receptor, type II                                                        | 0.519 | 1.741 | 1.283 |
| 93      | ACVR2B      | activin A receptor, type IIB                                                       | 1.426 | 1.726 | 1.941 |
| 94      | ACVRL1      | activin A receptor type II-like 1                                                  | 2.041 | 1.892 | 1.132 |
| 132     | ADK         | adenosine kinase                                                                   | 1.445 | 0.808 | 1.101 |
| 156     | ADRBK1      | adrenergic, beta, receptor kinase 1                                                | 0.684 | 1.708 | 1.084 |
| 157     | ADRBK2      | adrenergic, beta, receptor kinase 2                                                | 0.784 | 1.599 | 1.365 |
| 203     | AK1         | adenylate kinase 1                                                                 | 1.574 | 0.613 | 0.852 |
| 205     | AK3         | adenylate kinase 3                                                                 | 1.706 | 0.909 | 0.783 |
| 207     | AKT1        | v-akt murine thymoma viral oncogene homolog 1                                      | 0.975 | 0.659 | 0.684 |
| 208     | AKT2        | v-akt murine thymoma viral oncogene homolog 2                                      | 1.194 | 1.29  | 1.692 |
| 238     | ALK         | anaplastic lymphoma kinase (Ki-1)                                                  | 1.138 | 1.944 | 3.278 |
| 269     | AMHR2       | anti-Mullerian hormone receptor, type II                                           | 0.637 | 1.387 | 1.587 |
| 369     | ARAF        | v-raf murine sarcoma 3611 viral oncogene homolog                                   | 2.378 | 3.385 | 2.487 |
| 472     | ATM         | ataxia telangiectasia mutated (includes complementation groups A, C and D)         | 2.508 | 2.682 | 2.323 |
| 545     | ATR         | ataxia telangiectasia and Rad3 related                                             | 1.985 | 1.285 | 1.075 |
| 558     | AXL         | AXL receptor tyrosine kinase                                                       | 1.374 | 1.159 | 1.057 |
| 613     | BCR         | breakpoint cluster region                                                          | 1.758 | 1.03  | 1.192 |
| 640     | BLK         | B lymphoid tyrosine kinase                                                         | 0.532 | 1.151 | 1.174 |
| 657     | BMPR1A      | bone morphogenetic protein receptor, type IA                                       | 1.143 | 0.71  | 0.717 |
| 658     | BMPR1B      | bone morphogenetic protein receptor, type IB                                       | 0.364 | 0.672 | 0.696 |
| 659     | BMPR2       | bone morphogenetic protein receptor, type II (serine/threonine kinase)             | 0.919 | 1.43  | 0.976 |
| 660     | BMX         | BMX non-receptor tyrosine kinase                                                   | 0.791 | 0.818 | 1.458 |
| 673     | BRAF        | v-raf murine sarcoma viral oncogene homolog B1                                     | 2.929 | 1.312 | 1.064 |
| 676     | BRDT        | bromodomain, testis-specific                                                       | 1.375 | 1.535 | 1.424 |
| 695     | BTK         | Bruton agammaglobulinemia tyrosine kinase                                          | 1.367 | 2.213 | 0.944 |
| 699     | BUB1        | BUB1 budding uninhibited by benzimidazoles 1 homolog (yeast)                       | 0.547 | 0.622 | 0.613 |
| 701     | BUB1B       | BUB1 budding uninhibited by benzimidazoles 1 homolog beta (yeast)                  | 1.056 | 1.492 | 1.542 |
| 780     | DDR1        | discoidin domain receptor family, member 1                                         | 0.887 | 1.13  | 1.232 |
| 801     | CALM1       | calmodulin 1 (phosphorylase kinase, delta)                                         | 0.879 | 0.848 | 0.724 |
| 805     | CALM2       | calmodulin 2 (phosphorylase kinase, delta)                                         | 0.798 | 0.954 | 1.107 |
| 808     | CALM3       | calmodulin 3 (phosphorylase kinase, delta)                                         | 1.044 | 1.1   | 1.022 |
| 814     | CAMK4       | calcium/calmodulin-dependent protein kinase IV                                     | 1.271 | 1.631 | 1.391 |
| 815     | CAMK2A      | calcium/calmodulin-dependent protein kinase (CaM kinase) II alpha                  | 1.296 | 1.305 | 1.591 |
| 816     | CAMK2B      | calcium/calmodulin-dependent protein kinase (CaM kinase) II beta                   | 1.709 | 1.606 | 1.32  |
| 817     | CAMK2D      | calcium/calmodulin-dependent protein kinase (CaM kinase) II delta                  | 1.026 | 1.173 | 1.344 |
| 818     | CAMK2G      | calcium/calmodulin-dependent protein kinase (CaM kinase) II gamma                  | 1.72  | 0.858 | 1.249 |
| 983     | CDC2        | cell division cycle 2, G1 to S and G2 to M                                         | 0.907 | 1.697 | 1.112 |
| 984     | CDC2L1      | cell division cycle 2-like 1 (PITSLRE proteins)                                    | 1.155 | 0.666 | 0.708 |
| 1017    | CDK2        | cyclin-dependent kinase 2                                                          | 0.518 | 0.99  | 0.642 |
| 1018    | CDK3        | cyclin-dependent kinase 3                                                          | 1.331 | 0.812 | 1.437 |
| 1019    | CDK4        | cyclin-dependent kinase 4                                                          | 1.627 | 1.124 | 1.058 |
| 1020    | CDK5        | cyclin-dependent kinase 5                                                          | 0.787 | 0.743 | 0.787 |
| 1021    | CDK6        | cyclin-dependent kinase 6                                                          | 1.955 | 0.976 | 1.289 |
| 1022    | CDK7        | cyclin-dependent kinase 7 (MO15 homolog, Xenopus laevis, cdk-activating kinase)    | 1.475 | 2.203 | 1.256 |
| 1024    | CDK8        | cyclin-dependent kinase 8                                                          | 1.045 | 1.986 | 1.474 |

|      |         |                                                                                                        |       |       |       |
|------|---------|--------------------------------------------------------------------------------------------------------|-------|-------|-------|
| 1025 | CDK9    | cyclin-dependent kinase 9 (CDC2-related kinase)                                                        | 0.474 | 2.043 | 2.727 |
| 1111 | CHEK1   | CHK1 checkpoint homolog (S. pombe)                                                                     | 1.748 | 1.488 | 0.939 |
| 1119 | CHKA    | choline kinase alpha                                                                                   | 1.548 | 0.7   | 0.679 |
| 1147 | CHUK    | conserved helix-loop-helix ubiquitous kinase                                                           | 1.301 | 1.364 | 1.859 |
| 1158 | CKM     | creatine kinase, muscle                                                                                | 1.458 | 0.608 | 0.617 |
| 1159 | CKMT1   | creatine kinase, mitochondrial 1 (ubiquitous)                                                          | 1.739 | 0.479 | 0.794 |
| 1160 | CKMT2   | creatine kinase, mitochondrial 2 (sarcomeric)                                                          | 0.875 | 0.6   | 0.775 |
| 1195 | CLK1    | CDC-like kinase 1                                                                                      | 1.174 | 2.254 | 1.489 |
| 1196 | CLK2    | CDC-like kinase 2                                                                                      | 1.777 | 1.115 | 1.133 |
| 1198 | CLK3    | CDC-like kinase 3                                                                                      | 0.586 | 1.088 | 1.226 |
| 1263 | PLK3    | polo-like kinase 3 (Drosophila)                                                                        | 2.163 | 1.965 | 1.966 |
| 1326 | MAP3K8  | mitogen-activated protein kinase kinase kinase 8                                                       | 1.181 | 1.093 | 0.692 |
| 1399 | CRKL    | v-crk sarcoma virus CT10 oncogene homolog (avian)-like                                                 | 2.425 | 0.664 | 0.714 |
| 1432 | MAPK14  | mitogen-activated protein kinase 14                                                                    | 1.442 | 1.235 | 1.402 |
| 1436 | CSF1R   | colony stimulating factor 1 receptor, formerly McDonough feline sarcoma viral (v-fms) oncogene homolog | 1.401 | 0.128 | 1.392 |
| 1445 | CSK     | c-src tyrosine kinase                                                                                  | 1.487 | 1.494 | 1.167 |
| 1452 | CSNK1A1 | casein kinase 1, alpha 1                                                                               | 0.523 | 1.107 | 1.025 |
| 1453 | CSNK1D  | casein kinase 1, delta                                                                                 | 0.556 | 1.007 | 0.745 |
| 1454 | CSNK1E  | casein kinase 1, epsilon                                                                               | 0.95  | 0.601 | 0.577 |
| 1455 | CSNK1G2 | casein kinase 1, gamma 2                                                                               | 2.483 | 1.081 | 1.388 |
| 1456 | CSNK1G3 | casein kinase 1, gamma 3                                                                               | 0.763 | 1.138 | 1.039 |
| 1457 | CSNK2A1 | casein kinase 2, alpha 1 polypeptide                                                                   | 1.115 | 1.292 | 1.292 |
| 1459 | CSNK2A2 | casein kinase 2, alpha prime polypeptide                                                               | 1.722 | 1.424 | 1.212 |
| 1606 | DGKA    | diacylglycerol kinase, alpha 80kDa                                                                     | 1.601 | 1.002 | 0.666 |
| 1607 | DGKB    | diacylglycerol kinase, beta 90kDa                                                                      | 0.9   | 0.502 | 0.888 |
| 1608 | DGKG    | diacylglycerol kinase, gamma 90kDa                                                                     | 1.952 | 1.494 | 0.955 |
| 1609 | DGKQ    | diacylglycerol kinase, theta 110kDa                                                                    | 1.593 | 0.955 | 0.788 |
| 1612 | DAPK1   | death-associated protein kinase 1                                                                      | 1.033 | 1.792 | 1.87  |
| 1613 | DAPK3   | death-associated protein kinase 3                                                                      | 0.666 | 1.408 | 1.714 |
| 1716 | DGUOK   | deoxyguanosine kinase                                                                                  | 1.78  | 0.625 | 0.894 |
| 1739 | DLG1    | discs, large homolog 1 (Drosophila)                                                                    | 1.791 | 0.88  | 1.233 |
| 1740 | DLG2    | discs, large homolog 2, chapsyn-110 (Drosophila)                                                       | 1.283 | 0.732 | 0.703 |
| 1741 | DLG3    | discs, large homolog 3 (neuroendocrine-dlg, Drosophila)                                                | 1.48  | 0.869 | 0.776 |
| 1742 | DLG4    | discs, large homolog 4 (Drosophila)                                                                    | 1.504 | 0.447 | 0.678 |
| 1760 | DMPK    | dystrophia myotonica-protein kinase                                                                    | 1.589 | 1.557 | 1.401 |
| 1841 | DTYMK   | deoxythymidylate kinase (thymidylate kinase)                                                           | 0.662 | 0.921 | 0.913 |
| 1859 | DYRK1A  | dual-specificity tyrosine-(Y)-phosphorylation regulated kinase 1A                                      | 1.523 | 1.238 | 1.404 |
| 1956 | EGFR    | epidermal growth factor receptor (erythroblastic leukemia viral (v-erb-b) oncogene homolog, avian)     | 2.32  | 3.205 | 3.417 |
| 1969 | EPHA2   | EPH receptor A2                                                                                        | 1.51  | 1.207 | 1.117 |
| 2011 | MARK2   | MAP/microtubule affinity-regulating kinase 2                                                           | 0.861 | 1.22  | 1.215 |
| 2041 | EPHA1   | EPH receptor A1                                                                                        | 1.029 | 0.871 | 1.097 |
| 2042 | EPHA3   | EPH receptor A3                                                                                        | 0.581 | 0.83  | 1.385 |
| 2043 | EPHA4   | EPH receptor A4                                                                                        | 0.917 | 0.782 | 1.105 |
| 2044 | EPHA5   | EPH receptor A5                                                                                        | 0.577 | 0.896 | 1.02  |
| 2045 | EPHA7   | EPH receptor A7                                                                                        | 1.233 | 1.428 | 1.805 |
| 2046 | EPHA8   | EPH receptor A8                                                                                        | 0.579 | 1.348 | 1.361 |
| 2047 | EPHB1   | EPH receptor B1                                                                                        | 1     | 1.286 | 1.018 |
| 2048 | EPHB2   | EPH receptor B2                                                                                        | 1.293 | 1.577 | 1.128 |
| 2049 | EPHB3   | EPH receptor B3                                                                                        | 1.759 | 2.295 | 2.558 |
| 2050 | EPHB4   | EPH receptor B4                                                                                        | 0.581 | 1.252 | 0.963 |
| 2051 | EPHB6   | EPH receptor B6                                                                                        | 2.573 | 1.474 | 1.051 |

|      |        |                                                                                                                     |       |       |       |
|------|--------|---------------------------------------------------------------------------------------------------------------------|-------|-------|-------|
| 2064 | ERBB2  | v-erb-b2 erythroblastic leukemia viral oncogene homolog 2, neuro/glioblastoma derived oncogene homolog (avian)      | 1.338 | 1.726 | 1.516 |
| 2065 | ERBB3  | v-erb-b2 erythroblastic leukemia viral oncogene homolog 3 (avian)                                                   | 0.778 | 1.18  | 1.164 |
| 2066 | ERBB4  | v-erb-a erythroblastic leukemia viral oncogene homolog 4 (avian)                                                    | 3.74  | 2.31  | 1.931 |
| 2081 | ERN1   | endoplasmic reticulum to nucleus signalling 1                                                                       | 1.277 | 0.855 | 1.286 |
| 2185 | PTK2B  | PTK2B protein tyrosine kinase 2 beta                                                                                | 1.201 | 0.718 | 1.251 |
| 2241 | FER    | fer (fps/fes related) tyrosine kinase (phosphoprotein NCP94)                                                        | 2.251 | 0.973 | 1.582 |
| 2242 | FES    | feline sarcoma oncogene                                                                                             | 1.274 | 1.021 | 1.175 |
| 2261 | FGFR3  | fibroblast growth factor receptor 3 (achondroplasia, thanatophoric dwarfism)                                        | 0.916 | 1.013 | 1.232 |
| 2263 | FGFR2  | fibroblast growth factor receptor 2 (bacteria-expressed kinase, keratinocyte growth factor receptor, craniofacial d | 0.836 | 1.168 | 1.732 |
| 2264 | FGFR4  | fibroblast growth factor receptor 4                                                                                 | 0.809 | 1.242 | 1.443 |
| 2268 | FGR    | Gardner-Rasheed feline sarcoma viral (v-fgr) oncogene homolog                                                       | 1.773 | 1.13  | 2.409 |
| 2321 | FLT1   | fms-related tyrosine kinase 1 (vascular endothelial growth factor/vascular permeability factor receptor)            | 2.454 | 1.637 | 1.213 |
| 2322 | FLT3   | fms-related tyrosine kinase 3                                                                                       | 0.82  | 2.345 | 2.33  |
| 2324 | FLT4   | fms-related tyrosine kinase 4                                                                                       | 1.633 | 1.755 | 1.397 |
| 2395 | FXN    | frataxin                                                                                                            | 1.263 | 0.594 | 0.761 |
| 2444 | FRK    | fyn-related kinase                                                                                                  | 1.172 | 1.18  | 1.546 |
| 2475 | FRAP1  | FK506 binding protein 12-rapamycin associated protein 1                                                             | 0.971 | 2.43  | 3.452 |
| 2534 | FYN    | FYN oncogene related to SRC, FGR, YES                                                                               | 2.458 | 2.029 | 2.539 |
| 2580 | GAK    | cyclin G associated kinase                                                                                          | 0.843 | 1.682 | 1.234 |
| 2585 | GALK2  | galactokinase 2                                                                                                     | 1.743 | 0.646 | 0.754 |
| 2645 | GCK    | glucokinase (hexokinase 4, maturity onset diabetes of the young 2)                                                  | 0.821 | 0.666 | 0.843 |
| 2712 | GK2    | glycerol kinase 2                                                                                                   | 1.082 | 0.558 | 1.201 |
| 2868 | GRK4   | G protein-coupled receptor kinase 4                                                                                 | 0.907 | 1.308 | 1.079 |
| 2869 | GRK5   | G protein-coupled receptor kinase 5                                                                                 | 1.687 | 4.365 | 3.03  |
| 2870 | GRK6   | G protein-coupled receptor kinase 6                                                                                 | 1.122 | 1.072 | 1.465 |
| 2872 | MKNK2  | MAP kinase interacting serine/threonine kinase 2                                                                    | 1.97  | 0.927 | 1.222 |
| 2931 | GSK3A  | glycogen synthase kinase 3 alpha                                                                                    | 1.179 | 0.988 | 0.881 |
| 2932 | GSK3B  | glycogen synthase kinase 3 beta                                                                                     | 1.529 | 1.044 | 1.597 |
| 2984 | GUCY2C | guanylate cyclase 2C (heat stable enterotoxin receptor)                                                             | 1.475 | 2.072 | 1.71  |
| 2986 | GUCY2F | guanylate cyclase 2F, retinal                                                                                       | 0.706 | 1.079 | 1.277 |
| 3000 | GUCY2D | guanylate cyclase 2D, membrane (retina-specific)                                                                    | 1.03  | 1.414 | 1.403 |
| 3055 | HCK    | hemopoietic cell kinase                                                                                             | 0.712 | 0.722 | 0.507 |
| 3098 | HK1    | hexokinase 1                                                                                                        | 1.958 | 0.808 | 1.214 |
| 3099 | HK2    | hexokinase 2                                                                                                        | 1.153 | 0.641 | 1.083 |
| 3101 | HK3    | hexokinase 3 (white cell)                                                                                           | 2.137 | 0.756 | 1.202 |
| 3480 | IGF1R  | insulin-like growth factor 1 receptor                                                                               | 1.205 | 2.134 | 3.055 |
| 3482 | IGF2R  | insulin-like growth factor 2 receptor                                                                               | 1.19  | 0.568 | 1.057 |
| 3551 | IKBKB  | inhibitor of kappa light polypeptide gene enhancer in B-cells, kinase beta                                          | 1.808 | 1.482 | 1.357 |
| 3611 | ILK    | integrin-linked kinase                                                                                              | 1.51  | 0.898 | 0.846 |
| 3643 | INSR   | insulin receptor                                                                                                    | 1.171 | 0.987 | 1.626 |
| 3645 | INSRR  | insulin receptor-related receptor                                                                                   | 1.632 | 1.049 | 0.909 |
| 3654 | IRAK1  | interleukin-1 receptor-associated kinase 1                                                                          | 2.054 | 0.931 | 1.299 |
| 3656 | IRAK2  | interleukin-1 receptor-associated kinase 2                                                                          | 1.426 | 1.996 | 1.394 |
| 3702 | ITK    | IL2-inducible T-cell kinase                                                                                         | 1.439 | 1.791 | 1.72  |
| 3705 | ITPK1  | inositol 1,3,4-triphosphate 5/6 kinase                                                                              | 2.359 | 0.689 | 1.078 |
| 3706 | ITPKA  | inositol 1,4,5-trisphosphate 3-kinase A                                                                             | 0.561 | 0.724 | 0.748 |
| 3707 | ITPKB  | inositol 1,4,5-trisphosphate 3-kinase B                                                                             | 2.2   | 0.492 | 0.743 |
| 3716 | JAK1   | Janus kinase 1 (a protein tyrosine kinase)                                                                          | 1.585 | 5.74  | 3.284 |
| 3717 | JAK2   | Janus kinase 2 (a protein tyrosine kinase)                                                                          | 0.834 | 1.587 | 1.687 |
| 3718 | JAK3   | Janus kinase 3 (a protein tyrosine kinase, leukocyte)                                                               | 0.766 | 1.613 | 1.115 |
| 3791 | KDR    | kinase insert domain receptor (a type III receptor tyrosine kinase)                                                 | 1     | 1.128 | 0.899 |

|      |         |                                                                                    |       |       |       |
|------|---------|------------------------------------------------------------------------------------|-------|-------|-------|
| 3795 | KHK     | ketohehexokinase (fructokinase)                                                    | 1.602 | 0.587 | 0.944 |
| 3815 | KIT     | v-kit Hardy-Zuckerman 4 feline sarcoma viral oncogene homolog                      | 1.177 | 0.733 | 2.126 |
| 3932 | LCK     | lymphocyte-specific protein tyrosine kinase                                        | 0.649 | 1.415 | 1.078 |
| 3984 | LIMK1   | LIM domain kinase 1                                                                | 1.398 | 0.948 | 1.204 |
| 3985 | LIMK2   | LIM domain kinase 2                                                                | 0.766 | 0.766 | 0.72  |
| 4058 | LTK     | leukocyte tyrosine kinase                                                          | 1.285 | 0.78  | 1.065 |
| 4067 | LYN     | v-yes-1 Yamaguchi sarcoma viral related oncogene homolog                           | 0.429 | 0.912 | 1.15  |
| 4117 | MAK     | male germ cell-associated kinase                                                   | 1.073 | 0.996 | 1.023 |
| 4139 | MARK1   | MAP/microtubule affinity-regulating kinase 1                                       | 1.314 | 0.985 | 1.463 |
| 4140 | MARK3   | MAP/microtubule affinity-regulating kinase 3                                       | 1.338 | 1.244 | 1.055 |
| 4145 | MATK    | megakaryocyte-associated tyrosine kinase                                           | 0.764 | 0.937 | 0.726 |
| 4214 | MAP3K1  | mitogen-activated protein kinase kinase kinase 1                                   | 1.854 | 0.591 | 1.008 |
| 4215 | MAP3K3  | mitogen-activated protein kinase kinase kinase 3                                   | 1.763 | 1.415 | 1.364 |
| 4216 | MAP3K4  | mitogen-activated protein kinase kinase kinase 4                                   | 1.7   | 0.778 | 1.2   |
| 4217 | MAP3K5  | mitogen-activated protein kinase kinase kinase 5                                   | 1.106 | 0.993 | 0.994 |
| 4233 | MET     | met proto-oncogene (hepatocyte growth factor receptor)                             | 2.981 | 0.97  | 1.107 |
| 4293 | MAP3K9  | mitogen-activated protein kinase kinase kinase 9                                   | 1.568 | 0.933 | 1.249 |
| 4294 | MAP3K10 | mitogen-activated protein kinase kinase kinase 10                                  | 1.196 | 1.095 | 1.746 |
| 4296 | MAP3K11 | mitogen-activated protein kinase kinase kinase 11                                  | 1.139 | 2.415 | 0.943 |
| 4342 | MOS     | v-mos Moloney murine sarcoma viral oncogene homolog                                | 0.729 | 0.766 | 0.749 |
| 4354 | MPP1    | membrane protein, palmitoylated 1, 55kDa                                           | 1.861 | 0.514 | 0.618 |
| 4355 | MPP2    | membrane protein, palmitoylated 2 (MAGUK p55 subfamily member 2)                   | 0.949 | 0.832 | 0.869 |
| 4356 | MPP3    | membrane protein, palmitoylated 3 (MAGUK p55 subfamily member 3)                   | 1.472 | 0.498 | 0.93  |
| 4486 | MST1R   | macrophage stimulating 1 receptor (c-met-related tyrosine kinase)                  | 1.327 | 0.861 | 1.241 |
| 4593 | MUSK    | muscle, skeletal, receptor tyrosine kinase                                         | 2.521 | 1.684 | 1.501 |
| 4598 | MVK     | mevalonate kinase (mevalonic aciduria)                                             | 1.009 | 0.683 | 1.041 |
| 4638 | MYLK    | myosin, light polypeptide kinase                                                   | 1.584 | 0.963 | 1.351 |
| 4750 | NEK1    | NIMA (never in mitosis gene a)-related kinase 1                                    | 1.294 | 2.517 | 2.859 |
| 4751 | NEK2    | NIMA (never in mitosis gene a)-related kinase 2                                    | 0.693 | 1.013 | 1.04  |
| 4752 | NEK3    | NIMA (never in mitosis gene a)-related kinase 3                                    | 0.625 | 1.016 | 0.964 |
| 4831 | NME2    | non-metastatic cells 2, protein (NM23B) expressed in                               | 0.991 | 0.562 | 1.076 |
| 4881 | NPR1    | natriuretic peptide receptor A/guanylate cyclase A (atriuretic peptide receptor A) | 0.893 | 1.118 | 1.054 |
| 4882 | NPR2    | natriuretic peptide receptor B/guanylate cyclase B (atriuretic peptide receptor B) | 0.869 | 1.449 | 0.959 |
| 4914 | NTRK1   | neurotrophic tyrosine kinase, receptor, type 1                                     | 1.467 | 1.639 | 1.225 |
| 4915 | NTRK2   | neurotrophic tyrosine kinase, receptor, type 2                                     | 2.04  | 1.406 | 1.157 |
| 4916 | NTRK3   | neurotrophic tyrosine kinase, receptor, type 3                                     | 0.847 | 1.044 | 1.462 |
| 4919 | ROR1    | receptor tyrosine kinase-like orphan receptor 1                                    | 0.74  | 1.005 | 1.082 |
| 4920 | ROR2    | receptor tyrosine kinase-like orphan receptor 2                                    | 0.873 | 1.203 | 1.235 |
| 4921 | DDR2    | discoidin domain receptor family, member 2                                         | 2.066 | 2.529 | 2.212 |
| 5058 | PAK1    | p21/Cdc42/Rac1-activated kinase 1 (STE20 homolog, yeast)                           | 1.571 | 2.283 | 1.378 |
| 5062 | PAK2    | p21 (CDKN1A)-activated kinase 2                                                    | 1.166 | 2.567 | 1.301 |
| 5063 | PAK3    | p21 (CDKN1A)-activated kinase 3                                                    | 0.737 | 1.223 | 1.03  |
| 5127 | PCK1    | PCTAIRE protein kinase 1                                                           | 0.944 | 0.57  | 0.931 |
| 5128 | PCK2    | PCTAIRE protein kinase 2                                                           | 0.877 | 1.348 | 1.694 |
| 5129 | PCK3    | PCTAIRE protein kinase 3                                                           | 0.906 | 0.676 | 1.445 |
| 5156 | PDGFRA  | platelet-derived growth factor receptor, alpha polypeptide                         | 0.798 | 1.175 | 1.385 |
| 5157 | PDGFRB  | platelet-derived growth factor receptor-like                                       | 1.084 | 0.613 | 1.269 |
| 5159 | PDGFRB  | platelet-derived growth factor receptor, beta polypeptide                          | 1.237 | 0.833 | 1.165 |
| 5163 | PDK1    | pyruvate dehydrogenase kinase, isoenzyme 1                                         | 1.425 | 1.079 | 1.117 |
| 5164 | PDK2    | pyruvate dehydrogenase kinase, isoenzyme 2                                         | 0.658 | 1.241 | 1.395 |
| 5165 | PDK3    | pyruvate dehydrogenase kinase, isoenzyme 3                                         | 0.611 | 0.991 | 0.506 |

|      |         |                                                             |       |       |       |
|------|---------|-------------------------------------------------------------|-------|-------|-------|
| 5166 | PDK4    | pyruvate dehydrogenase kinase, isoenzyme 4                  | 1.782 | 1.201 | 1.347 |
| 5170 | PDPK1   | 3-phosphoinositide dependent protein kinase-1               | 3.177 | 0.931 | 1.985 |
| 5207 | PFKFB1  | 6-phosphofructo-2-kinase/fructose-2,6-biphosphatase 1       | 2.098 | 0.643 | 0.964 |
| 5208 | PFKFB2  | 6-phosphofructo-2-kinase/fructose-2,6-biphosphatase 2       | 0.724 | 0.854 | 0.824 |
| 5209 | PFKFB3  | 6-phosphofructo-2-kinase/fructose-2,6-biphosphatase 3       | 0.99  | 0.804 | 1.078 |
| 5210 | PFKFB4  | 6-phosphofructo-2-kinase/fructose-2,6-biphosphatase 4       | 0.235 | 0.564 | 0.529 |
| 5211 | PFKL    | phosphofructokinase, liver                                  | 0.718 | 1.191 | 1.056 |
| 5213 | PFKM    | phosphofructokinase, muscle                                 | 2.029 | 1.397 | 1.509 |
| 5214 | PFKP    | phosphofructokinase, platelet                               | 0.47  | 0.592 | 1.261 |
| 5218 | PFTK1   | PFTAIRE protein kinase 1                                    | 1.206 | 0.768 | 0.874 |
| 5230 | PGK1    | phosphoglycerate kinase 1                                   | 1.288 | 0.869 | 1.203 |
| 5232 | PGK2    | phosphoglycerate kinase 2                                   | 0.403 | 0.92  | 0.769 |
| 5255 | PHKA1   | phosphorylase kinase, alpha 1 (muscle)                      | 1.145 | 0.933 | 0.816 |
| 5256 | PHKA2   | phosphorylase kinase, alpha 2 (liver)                       | 1.345 | 1.126 | 0.834 |
| 5257 | PHKB    | phosphorylase kinase, beta                                  | 0.776 | 0.977 | 1.015 |
| 5260 | PHKG1   | phosphorylase kinase, gamma 1 (muscle)                      | 1.742 | 1.451 | 1.214 |
| 5261 | PHKG2   | phosphorylase kinase, gamma 2 (testis)                      | 1.101 | 1.247 | 0.988 |
| 5286 | PIK3C2A | phosphoinositide-3-kinase, class 2, alpha polypeptide       | 1.174 | 0.982 | 0.925 |
| 5287 | PIK3C2B | phosphoinositide-3-kinase, class 2, beta polypeptide        | 0.651 | 1.01  | 0.835 |
| 5288 | PIK3C2G | phosphoinositide-3-kinase, class 2, gamma polypeptide       | 0.926 | 0.956 | 1.336 |
| 5289 | PIK3C3  | phosphoinositide-3-kinase, class 3                          | 0.917 | 0.755 | 0.828 |
| 5290 | PIK3CA  | phosphoinositide-3-kinase, catalytic, alpha polypeptide     | 0.721 | 0.955 | 1.052 |
| 5291 | PIK3CB  | phosphoinositide-3-kinase, catalytic, beta polypeptide      | 1.299 | 1.221 | 1.06  |
| 5292 | PIM1    | pim-1 oncogene                                              | 1.555 | 0.993 | 0.901 |
| 5293 | PIK3CD  | phosphoinositide-3-kinase, catalytic, delta polypeptide     | 1.334 | 1.072 | 1.267 |
| 5294 | PIK3CG  | phosphoinositide-3-kinase, catalytic, gamma polypeptide     | 1.437 | 0.75  | 0.955 |
| 5297 | PIK4CA  | phosphatidylinositol 4-kinase, catalytic, alpha polypeptide | 0.771 | 1.286 | 0.852 |
| 5298 | PIK4CB  | phosphatidylinositol 4-kinase, catalytic, beta polypeptide  | 1.604 | 1     | 0.697 |
| 5305 | PIP5K2A | phosphatidylinositol-4-phosphate 5-kinase, type II, alpha   | 0.996 | 0.858 | 1.096 |
| 5313 | PKLR    | pyruvate kinase, liver and RBC                              | 0.885 | 1.052 | 1.163 |
| 5315 | PKM2    | pyruvate kinase, muscle                                     | 1.179 | 0.841 | 0.743 |
| 5347 | PLK1    | polo-like kinase 1 (Drosophila)                             | 0.649 | 0.854 | 0.501 |
| 5394 | EXOSC10 | exosome component 10                                        | 0.664 | 0.597 | 0.867 |
| 5562 | PRKAA1  | protein kinase, AMP-activated, alpha 1 catalytic subunit    | 1.051 | 1.049 | 1.335 |
| 5563 | PRKAA2  | protein kinase, AMP-activated, alpha 2 catalytic subunit    | 1.474 | 0.573 | 0.971 |
| 5566 | PRKACA  | protein kinase, cAMP-dependent, catalytic, alpha            | 0.602 | 0.862 | 0.828 |
| 5567 | PRKACB  | protein kinase, cAMP-dependent, catalytic, beta             | 1.735 | 1.105 | 1.825 |
| 5568 | PRKACG  | protein kinase, cAMP-dependent, catalytic, gamma            | 1.027 | 1.103 | 1.082 |
| 5578 | PRKCA   | protein kinase C, alpha                                     | 1.201 | 0.812 | 0.596 |
| 5579 | PRKCB1  | protein kinase C, beta 1                                    | 0.86  | 1.346 | 0.926 |
| 5580 | PRKCD   | protein kinase C, delta                                     | 1.173 | 0.854 | 1.254 |
| 5581 | PRKCE   | protein kinase C, epsilon                                   | 2.009 | 0.406 | 1.008 |
| 5582 | PRKCG   | protein kinase C, gamma                                     | 0.952 | 0.847 | 1     |
| 5583 | PRKCH   | protein kinase C, eta                                       | 0.832 | 1.641 | 1.389 |
| 5584 | PRKCI   | protein kinase C, iota                                      | 0.818 | 1.015 | 1.147 |
| 5585 | PKN1    | protein kinase N1                                           | 1.484 | 2.185 | 1.801 |
| 5586 | PKN2    | protein kinase N2                                           | 1.421 | 1.843 | 1.981 |
| 5587 | PRKD1   | protein kinase D1                                           | 0.897 | 1.061 | 0.772 |
| 5588 | PRKCQ   | protein kinase C, theta                                     | 1.239 | 1.217 | 1.156 |
| 5590 | PRKCZ   | protein kinase C, zeta                                      | 0.893 | 0.569 | 0.689 |
| 5591 | PRKDC   | protein kinase, DNA-activated, catalytic polypeptide        | 1.721 | 1.575 | 1.239 |

|      |          |                                                                                                           |       |       |       |
|------|----------|-----------------------------------------------------------------------------------------------------------|-------|-------|-------|
| 5592 | PRKG1    | protein kinase, cGMP-dependent, type I                                                                    | 0.798 | 2.216 | 1.962 |
| 5593 | PRKG2    | protein kinase, cGMP-dependent, type II                                                                   | 1.261 | 1.297 | 1.118 |
| 5594 | MAPK1    | mitogen-activated protein kinase 1                                                                        | 1.164 | 0.768 | 0.755 |
| 5595 | MAPK3    | mitogen-activated protein kinase 3                                                                        | 1.096 | 0.782 | 0.63  |
| 5596 | MAPK4    | mitogen-activated protein kinase 4                                                                        | 0.667 | 0.852 | 0.485 |
| 5597 | MAPK6    | mitogen-activated protein kinase 6                                                                        | 1.037 | 1.143 | 1.171 |
| 5598 | MAPK7    | mitogen-activated protein kinase 7                                                                        | 1.4   | 1.083 | 1.108 |
| 5599 | MAPK8    | mitogen-activated protein kinase 8                                                                        | 0.471 | 1.392 | 1.135 |
| 5600 | MAPK11   | mitogen-activated protein kinase 11                                                                       | 1.41  | 1.035 | 0.664 |
| 5601 | MAPK9    | mitogen-activated protein kinase 9                                                                        | 1.55  | 2.414 | 1.268 |
| 5602 | MAPK10   | mitogen-activated protein kinase 10                                                                       | 0.859 | 1.288 | 0.8   |
| 5603 | MAPK13   | mitogen-activated protein kinase 13                                                                       | 1.242 | 1.043 | 1.346 |
| 5604 | MAP2K1   | mitogen-activated protein kinase kinase 1                                                                 | 3.581 | 1.414 | 1.194 |
| 5605 | MAP2K2   | mitogen-activated protein kinase kinase 2                                                                 | 1.46  | 1.32  | 0.925 |
| 5606 | MAP2K3   | mitogen-activated protein kinase kinase 3                                                                 | 1.643 | 0.491 | 0.764 |
| 5607 | MAP2K5   | mitogen-activated protein kinase kinase 5                                                                 | 1.53  | 1.862 | 1.878 |
| 5608 | MAP2K6   | mitogen-activated protein kinase kinase 6                                                                 | 1.516 | 1.116 | 1.542 |
| 5609 | MAP2K7   | mitogen-activated protein kinase kinase 7                                                                 | 0.375 | 0.641 | 0.631 |
| 5610 | EIF2AK2  | eukaryotic translation initiation factor 2-alpha kinase 2                                                 | 1.956 | 2.608 | 1.361 |
| 5613 | PRKX     | protein kinase, X-linked                                                                                  | 0.59  | 1.027 | 0.632 |
| 5616 | PRKY     | protein kinase, Y-linked                                                                                  | 1.753 | 0.816 | 2.162 |
| 5631 | PRPS1    | phosphoribosyl pyrophosphate synthetase 1                                                                 | 0.742 | 1.071 | 0.421 |
| 5634 | PRPS2    | phosphoribosyl pyrophosphate synthetase 2                                                                 | 1.121 | 0.923 | 0.574 |
| 5681 | PSKH1    | protein serine kinase H1                                                                                  | 1.228 | 0.877 | 0.944 |
| 5747 | PTK2     | PTK2 protein tyrosine kinase 2                                                                            | 1.419 | 1.192 | 1.483 |
| 5753 | PTK6     | PTK6 protein tyrosine kinase 6                                                                            | 1.589 | 0.957 | 1.31  |
| 5754 | PTK7     | PTK7 protein tyrosine kinase 7                                                                            | 1.592 | 1.141 | 1.552 |
| 5756 | PTK9     | PTK9 protein tyrosine kinase 9                                                                            | 2.154 | 1.451 | 1.639 |
| 5832 | ALDH18A1 | aldehyde dehydrogenase 18 family, member A1                                                               | 2.478 | 1.004 | 1.241 |
| 5871 | MAP4K2   | mitogen-activated protein kinase kinase kinase 2                                                          | 0.954 | 0.767 | 0.926 |
| 5891 | RAGE     | renal tumor antigen                                                                                       | 1.719 | 0.746 | 1.108 |
| 5894 | RAF1     | v-raf-1 murine leukemia viral oncogene homolog 1                                                          | 1.776 | 2.538 | 2.011 |
| 5979 | RET      | ret proto-oncogene (multiple endocrine neoplasia and medullary thyroid carcinoma 1, Hirschsprung disease) | 1.178 | 0.966 | 1.044 |
| 5987 | RFP      | ret finger protein                                                                                        | 0.4   | 1.536 | 0.576 |
| 6011 | GRK1     | G protein-coupled receptor kinase 1                                                                       | 1.3   | 1.15  | 1.223 |
| 6041 | RNASEL   | ribonuclease L (2',5'-oligoadenylate synthetase-dependent)                                                | 1.014 | 1.067 | 1.56  |
| 6046 | BRD2     | bromodomain containing 2                                                                                  | 0.578 | 0.933 | 1.046 |
| 6093 | ROCK1    | Rho-associated, coiled-coil containing protein kinase 1                                                   | 1.03  | 1.186 | 1.032 |
| 6098 | ROS1     | v-ros UR2 sarcoma virus oncogene homolog 1 (avian)                                                        | 1.772 | 1.131 | 1.13  |
| 6195 | RPS6KA1  | ribosomal protein S6 kinase, 90kDa, polypeptide 1                                                         | 0.987 | 1.02  | 1.15  |
| 6196 | RPS6KA2  | ribosomal protein S6 kinase, 90kDa, polypeptide 2                                                         | 2.007 | 1.46  | 1.446 |
| 6197 | RPS6KA3  | ribosomal protein S6 kinase, 90kDa, polypeptide 3                                                         | 2.92  | 1.624 | 1.052 |
| 6198 | RPS6KB1  | ribosomal protein S6 kinase, 70kDa, polypeptide 1                                                         | 2.365 | 0.889 | 1.355 |
| 6199 | RPS6KB2  | ribosomal protein S6 kinase, 70kDa, polypeptide 2                                                         | 1.528 | 1.022 | 1.154 |
| 6259 | RYK      | RYK receptor-like tyrosine kinase                                                                         | 1.63  | 1.437 | 1.318 |
| 6300 | MAPK12   | mitogen-activated protein kinase 12                                                                       | 1.964 | 3.323 | 1.775 |
| 6347 | CCL2     | chemokine (C-C motif) ligand 2                                                                            | 0.71  | 1.266 | 0.686 |
| 6416 | MAP2K4   | mitogen-activated protein kinase kinase 4                                                                 | 1.53  | 1.2   | 1.292 |
| 6446 | SGK      | serum/glucocorticoid regulated kinase                                                                     | 1.449 | 0.949 | 0.63  |
| 6714 | SRC      | v-src sarcoma (Schmidt-Ruppin A-2) viral oncogene homolog (avian)                                         | 1.482 | 1.104 | 1.194 |
| 6725 | SRMS     | src-related kinase lacking C-terminal regulatory tyrosine and N-terminal myristylation sites              | 1.301 | 2.325 | 1.464 |

|      |          |                                                                                             |       |       |       |
|------|----------|---------------------------------------------------------------------------------------------|-------|-------|-------|
| 6732 | SRPK1    | SFRS protein kinase 1                                                                       | 0.862 | 1.743 | 3.317 |
| 6733 | SRPK2    | SFRS protein kinase 2                                                                       | 0.971 | 1.091 | 1.239 |
| 6787 | NEK4     | NIMA (never in mitosis gene a)-related kinase 4                                             | 0.791 | 2.042 | 1.344 |
| 6788 | STK3     | serine/threonine kinase 3 (STE20 homolog, yeast)                                            | 1.218 | 1.116 | 1.379 |
| 6789 | STK4     | serine/threonine kinase 4                                                                   | 1.489 | 1.364 | 1.796 |
| 6790 | STK6     | serine/threonine kinase 6                                                                   | 1.556 | 1.368 | 2.166 |
| 6792 | CDKL5    | cyclin-dependent kinase-like 5                                                              | 1.071 | 0.527 | 1.029 |
| 6793 | STK10    | serine/threonine kinase 10                                                                  | 1.593 | 1.168 | 1.261 |
| 6794 | STK11    | serine/threonine kinase 11 (Peutz-Jeghers syndrome)                                         | 1.408 | 1.448 | 1.91  |
| 6795 | AURKC    | aurora kinase C                                                                             | 1.106 | 1.02  | 1.373 |
| 6850 | SYK      | spleen tyrosine kinase                                                                      | 1.123 | 1.314 | 1.293 |
| 6872 | TAF1     | TAF1 RNA polymerase II, TATA box binding protein (TBP)-associated factor, 250kDa            | 2.081 | 0.988 | 1.314 |
| 6885 | MAP3K7   | mitogen-activated protein kinase kinase kinase 7                                            | 0.723 | 1.386 | 1.249 |
| 7006 | TEC      | tec protein tyrosine kinase                                                                 | 1.301 | 0.918 | 1.286 |
| 7010 | TEK      | TEK tyrosine kinase, endothelial (venous malformations, multiple cutaneous and mucosal)     | 1.028 | 0.807 | 0.534 |
| 7016 | TESK1    | testis-specific kinase 1                                                                    | 0.898 | 1.219 | 1.057 |
| 7046 | TGFBR1   | transforming growth factor, beta receptor I (activin A receptor type II-like kinase, 53kDa) | 0.767 | 1.263 | 0.871 |
| 7048 | TGFBR2   | transforming growth factor, beta receptor II (70/80kDa)                                     | 0.89  | 1.112 | 1.282 |
| 7075 | TIE1     | tyrosine kinase with immunoglobulin-like and EGF-like domains 1                             | 1.466 | 1.968 | 1.437 |
| 7084 | TK2      | thymidine kinase 2, mitochondrial                                                           | 1.292 | 1.027 | 1.592 |
| 7204 | TRIO     | triple functional domain (PTPRF interacting)                                                | 1.492 | 1.713 | 1.16  |
| 7272 | TTK      | TTK protein kinase                                                                          | 2.238 | 2.047 | 1.378 |
| 7273 | TTN      | titin                                                                                       | 0.362 | 1.075 | 1.302 |
| 7294 | TXK      | TXK tyrosine kinase                                                                         | 1.139 | 2.03  | 2.601 |
| 7297 | TYK2     | tyrosine kinase 2                                                                           | 0.836 | 0.857 | 1.132 |
| 7301 | TYRO3    | TYRO3 protein tyrosine kinase                                                               | 1.733 | 0.971 | 2.012 |
| 7371 | UCK2     | uridine-cytidine kinase 2                                                                   | 1.117 | 1.17  | 0.804 |
| 7443 | VRK1     | vaccinia related kinase 1                                                                   | 1.22  | 0.933 | 1.547 |
| 7444 | VRK2     | vaccinia related kinase 2                                                                   | 1.268 | 1.026 | 1.076 |
| 7465 | WEE1     | WEE1 homolog (S. pombe)                                                                     | 1.782 | 0.705 | 1.044 |
| 7525 | YES1     | v-yes-1 Yamaguchi sarcoma viral oncogene homolog 1                                          | 1.161 | 1.529 | 1.423 |
| 7535 | ZAP70    | zeta-chain (TCR) associated protein kinase 70kDa                                            | 0.566 | 1.422 | 1.313 |
| 7786 | MAP3K12  | mitogen-activated protein kinase kinase kinase 12                                           | 1.094 | 1.272 | 0.854 |
| 7867 | MAPKAPK3 | mitogen-activated protein kinase-activated protein kinase 3                                 | 3.261 | 1.364 | 1.722 |
| 8019 | BRD3     | bromodomain containing 3                                                                    | 0.407 | 0.921 | 0.91  |
| 8295 | TRRAP    | transformation/transcription domain-associated protein                                      | 1.018 | 1.193 | 1.284 |
| 8317 | CDC7     | CDC7 cell division cycle 7 (S. cerevisiae)                                                  | 0.633 | 1.205 | 1.197 |
| 8382 | NME5     | non-metastatic cells 5, protein expressed in (nucleoside-diphosphate kinase)                | 0.672 | 0.841 | 0.82  |
| 8395 | PIP5K1B  | phosphatidylinositol-4-phosphate 5-kinase, type I, beta                                     | 0.445 | 0.971 | 0.98  |
| 8396 | PIP5K2B  | phosphatidylinositol-4-phosphate 5-kinase, type II, beta                                    | 0.686 | 0.915 | 0.494 |
| 8408 | ULK1     | unc-51-like kinase 1 (C. elegans)                                                           | 0.781 | 1.052 | 1.107 |
| 8428 | STK24    | serine/threonine kinase 24 (STE20 homolog, yeast)                                           | 1.254 | 1.468 | 1.384 |
| 8444 | DYRK3    | dual-specificity tyrosine-(Y)-phosphorylation regulated kinase 3                            | 2.706 | 5.119 | 4.6   |
| 8445 | DYRK2    | dual-specificity tyrosine-(Y)-phosphorylation regulated kinase 2                            | 0.791 | 0.903 | 1.273 |
| 8476 | CDC42BPA | CDC42 binding protein kinase alpha (DMPK-like)                                              | 1.358 | 1.004 | 1.287 |
| 8491 | MAP4K3   | mitogen-activated protein kinase kinase kinase 3                                            | 1.2   | 1.145 | 1.451 |
| 8525 | DGKZ     | diacylglycerol kinase, zeta 104kDa                                                          | 0.598 | 1.091 | 0.653 |
| 8526 | DGKE     | diacylglycerol kinase, epsilon 64kDa                                                        | 0.63  | 1.292 | 0.969 |
| 8527 | DGKD     | diacylglycerol kinase, delta 130kDa                                                         | 0.907 | 1.172 | 1.309 |
| 8536 | CAMK1    | calcium/calmodulin-dependent protein kinase I                                               | 0.382 | 0.959 | 1.072 |
| 8550 | MAPKAPK5 | mitogen-activated protein kinase-activated protein kinase 5                                 | 0.639 | 1.024 | 1.198 |

|      |          |                                                                                |       |       |       |
|------|----------|--------------------------------------------------------------------------------|-------|-------|-------|
| 8558 | CDK10    | cyclin-dependent kinase (CDC2-like) 10                                         | 1.907 | 0.974 | 1.004 |
| 8566 | PDXK     | pyridoxal (pyridoxine, vitamin B6) kinase                                      | 0.706 | 1.005 | 1.12  |
| 8569 | MKNK1    | MAP kinase interacting serine/threonine kinase 1                               | 1.345 | 1.607 | 2.536 |
| 8573 | CASK     | calcium/calmodulin-dependent serine protein kinase (MAGUK family)              | 1.609 | 1.506 | 0.929 |
| 8576 | STK16    | serine/threonine kinase 16                                                     | 0.59  | 1.3   | 1.088 |
| 8621 | CDC2L5   | cell division cycle 2-like 5 (cholinesterase-related cell division controller) | 1.599 | 1.477 | 1.737 |
| 8631 | SCAP1    | src family associated phosphoprotein 1                                         | 0.657 | 1.137 | 1.202 |
| 8711 | TNK1     | tyrosine kinase, non-receptor, 1                                               | 1.145 | 1.534 | 1.892 |
| 8737 | RIPK1    | receptor (TNFRSF)-interacting serine-threonine kinase 1                        | 1.72  | 2.484 | 2.334 |
| 8767 | RIPK2    | receptor-interacting serine-threonine kinase 2                                 | 1.446 | 0.838 | 1.483 |
| 8780 | RIOK3    | RIO kinase 3 (yeast)                                                           | 1.093 | 0.567 | 1.228 |
| 8798 | DYRK4    | dual-specificity tyrosine-(Y)-phosphorylation regulated kinase 4               | 1.038 | 1.365 | 1.292 |
| 8814 | CDKL1    | cyclin-dependent kinase-like 1 (CDC2-related kinase)                           | 1.542 | 1.569 | 0.952 |
| 8844 | KSR      | kinase suppressor of ras                                                       | 0.949 | 0.863 | 0.693 |
| 8859 | STK19    | serine/threonine kinase 19                                                     | 1.546 | 0.82  | 1.253 |
| 8877 | SPHK1    | sphingosine kinase 1                                                           | 0.69  | 1.001 | 1.037 |
| 8899 | PRPF4B   | PRP4 pre-mRNA processing factor 4 homolog B (yeast)                            | 1.92  | 1.689 | 1.313 |
| 8935 | SCAP2    | src family associated phosphoprotein 2                                         | 0.903 | 0.997 | 0.805 |
| 8986 | RPS6KA4  | ribosomal protein S6 kinase, 90kDa, polypeptide 4                              | 4.26  | 1.06  | 0.719 |
| 8999 | CDKL2    | cyclin-dependent kinase-like 2 (CDC2-related kinase)                           | 1.238 | 1.41  | 2.106 |
| 9020 | MAP3K14  | mitogen-activated protein kinase kinase kinase 14                              | 0.772 | 1.181 | 1.33  |
| 9024 | BRSK2    | BR serine/threonine kinase 2                                                   | 1.638 | 1.896 | 1.199 |
| 9064 | MAP3K6   | mitogen-activated protein kinase kinase kinase 6                               | 1.251 | 1.726 | 1.52  |
| 9088 | PKMYT1   | protein kinase, membrane associated tyrosine/threonine 1                       | 1.072 | 2.118 | 1.355 |
| 9113 | LATS1    | LATS, large tumor suppressor, homolog 1 (Drosophila)                           | 0.92  | 0.957 | 1.092 |
| 9149 | DYRK1B   | dual-specificity tyrosine-(Y)-phosphorylation regulated kinase 1B              | 1.446 | 1.385 | 1.302 |
| 9162 | DGKI     | diacylglycerol kinase, iota                                                    | 0.947 | 0.737 | 0.618 |
| 9175 | MAP3K13  | mitogen-activated protein kinase kinase kinase 13                              | 0.747 | 0.753 | 0.797 |
| 9201 | DCAMKL1  | doublecortin and CaM kinase-like 1                                             | 0.857 | 0.979 | 0.816 |
| 9212 | AURKB    | aurora kinase B                                                                | 1.346 | 1.833 | 1.58  |
| 9223 | BAIAP1   | BAI1-associated protein 1                                                      | 1.39  | 0.95  | 0.832 |
| 9252 | RPS6KA5  | ribosomal protein S6 kinase, 90kDa, polypeptide 5                              | 1.263 | 0.555 | 1.203 |
| 9261 | MAPKAPK2 | mitogen-activated protein kinase-activated protein kinase 2                    | 1.36  | 0.689 | 0.773 |
| 9262 | STK17B   | serine/threonine kinase 17b (apoptosis-inducing)                               | 1.132 | 2.033 | 1.453 |
| 9263 | STK17A   | serine/threonine kinase 17a (apoptosis-inducing)                               | 1.327 | 1.086 | 1.539 |
| 9344 | TAOK2    | TAO kinase 2                                                                   | 1     | 1.593 | 1.27  |
| 9414 | TJP2     | tight junction protein 2 (zona occludens 2)                                    | 0.821 | 1.354 | 0.735 |
| 9448 | MAP4K4   | mitogen-activated protein kinase kinase kinase kinase 4                        | 0.791 | 2.009 | 1.964 |
| 9451 | EIF2AK3  | eukaryotic translation initiation factor 2-alpha kinase 3                      | 0.478 | 0.965 | 1.041 |
| 9475 | ROCK2    | Rho-associated, coiled-coil containing protein kinase 2                        | 1.155 | 1.182 | 1.328 |
| 9578 | CDC42BPB | CDC42 binding protein kinase beta (DMPK-like)                                  | 2.278 | 1.587 | 2.945 |
| 9625 | AATK     | apoptosis-associated tyrosine kinase                                           | 1.344 | 0.491 | 0.96  |
| 9641 | IKBKE    | inhibitor of kappa light polypeptide gene enhancer in B-cells, kinase epsilon  | 2.213 | 2.195 | 2.332 |
| 9706 | ULK2     | unc-51-like kinase 2 (C. elegans)                                              | 1.341 | 1.056 | 1.164 |
| 9748 | SLK      | STE20-like kinase (yeast)                                                      | 1.106 | 1.315 | 1.07  |
| 9807 | IHPK1    | inositol hexaphosphate kinase 1                                                | 1.255 | 0.594 | 0.802 |
| 9833 | MELK     | maternal embryonic leucine zipper kinase                                       | 1.232 | 1.231 | 1.426 |
| 9874 | TLK1     | tousled-like kinase 1                                                          | 1.449 | 1.373 | 0.904 |
| 9891 | ARK5     | AMP-activated protein kinase family member 5                                   | 1.107 | 1.682 | 1.078 |
| 9942 | XYLB     | xylulokinase homolog (H. influenzae)                                           | 0.422 | 1.206 | 1.201 |
| 9943 | OXS1     | oxidative-stress responsive 1                                                  | 1.264 | 1.138 | 0.822 |



|       |          |                                                                              |       |       |       |
|-------|----------|------------------------------------------------------------------------------|-------|-------|-------|
| 10000 | AKT3     | v-akt murine thymoma viral oncogene homolog 3 (protein kinase B, gamma)      | 2.693 | 1.811 | 1.846 |
| 10020 | GNE      | glucosamine (UDP-N-acetyl)-2-epimerase/N-acetylmannosamine kinase            | 1.674 | 0.78  | 1.027 |
| 10087 | COL4A3BP | collagen, type IV, alpha 3 (Goodpasture antigen) binding protein             | 1.253 | 0.803 | 0.911 |
| 10110 | SGK2     | serum/glucocorticoid regulated kinase 2                                      | 0.964 | 1.242 | 0.835 |
| 10114 | HIPK3    | homeodomain interacting protein kinase 3                                     | 1.098 | 1.83  | 1.419 |
| 10155 | TRIM28   | tripartite motif-containing 28                                               | 1.183 | 0.768 | 1.003 |
| 10188 | TNK2     | tyrosine kinase, non-receptor, 2                                             | 1.124 | 1.758 | 1.448 |
| 10201 | NME6     | non-metastatic cells 6, protein expressed in (nucleoside-diphosphate kinase) | 1.028 | 0.608 | 0.794 |
| 10221 | TRIB1    | tribbles homolog 1 (Drosophila)                                              | 1.472 | 1.617 | 2.11  |
| 10290 | APEG1    | aortic preferentially expressed gene 1                                       | 1.072 | 2.316 | 1.718 |
| 10295 | BCKDK    | branched chain ketoacid dehydrogenase kinase                                 | 1.604 | 2.086 | 1.622 |
| 10298 | PAK4     | p21(CDKN1A)-activated kinase 4                                               | 0.767 | 1.336 | 0.988 |
| 10420 | TESK2    | testis-specific kinase 2                                                     | 1.377 | 1.662 | 1.309 |
| 10461 | MERTK    | c-mer proto-oncogene tyrosine kinase                                         | 1.42  | 1.153 | 1.205 |
| 10494 | STK25    | serine/threonine kinase 25 (STE20 homolog, yeast)                            | 0.747 | 1.441 | 0.967 |
| 10595 | ERN2     | endoplasmic reticulum to nucleus signalling 2                                | 1.093 | 0.691 | 0.893 |
| 10645 | CAMKK2   | calcium/calmodulin-dependent protein kinase kinase 2, beta                   | 1.438 | 1.062 | 1.155 |
| 10654 | PMVK     | phosphomevalonate kinase                                                     | 0.734 | 0.574 | 0.915 |
| 10733 | PLK4     | polo-like kinase 4 (Drosophila)                                              | 1.497 | 2.299 | 1.451 |
| 10746 | MAP3K2   | mitogen-activated protein kinase kinase kinase 2                             | 1.022 | 1.03  | 1.265 |
| 10769 | PLK2     | polo-like kinase 2 (Drosophila)                                              | 1.207 | 1.237 | 1.751 |
| 10783 | NEK6     | NIMA (never in mitosis gene a)-related kinase 6                              | 3.022 | 0.952 | 1.223 |
| 11011 | TLK2     | tousled-like kinase 2                                                        | 1.751 | 2.824 | 1.84  |
| 11035 | RIPK3    | receptor-interacting serine-threonine kinase 3                               | 1.23  | 1.442 | 2.572 |
| 11040 | PIM2     | pim-2 oncogene                                                               | 0.808 | 1.301 | 1.316 |
| 11113 | CIT      | citron (rho-interacting, serine/threonine kinase 21)                         | 1.165 | 1.748 | 1.281 |
| 11139 | KALRN    | kalirin, RhoGEF kin                                                          | 1     | 2.415 | 1.694 |
| 11183 | MAP4K5   | mitogen-activated protein kinase kinase kinase kinase 5                      | 1.16  | 0.826 | 0.899 |
| 11184 | MAP4K1   | mitogen-activated protein kinase kinase kinase kinase 1                      | 1.189 | 0.921 | 1.689 |
| 11200 | CHEK2    | CHK2 checkpoint homolog (S. pombe)                                           | 1.361 | 0.507 | 0.944 |
| 11213 | IRAK3    | interleukin-1 receptor-associated kinase 3                                   | 0.494 | 1.189 | 0.915 |
| 11329 | STK38    | serine/threonine kinase 38                                                   | 0.631 | 1.01  | 1.301 |
| 11344 | PTK9L    | PTK9L protein tyrosine kinase 9-like (A6-related protein)                    | 0.757 | 0.977 | 0.723 |
| 22848 | AAK1     | AP2 associated kinase 1                                                      | 0.857 | 1.307 | 1.676 |
| 22853 | LMTK2    | lemur tyrosine kinase 2                                                      | 0.837 | 0.946 | 1.287 |
| 22858 | ICK      | intestinal cell (MAK-like) kinase                                            | 1.516 | 0.859 | 1.973 |
| 22928 | SEPHS2   | selenophosphate synthetase 2                                                 | 1.565 | 0.772 | 1.059 |
| 22983 | MAST1    | microtubule associated serine/threonine kinase 1                             | 1.774 | 1.457 | 1.165 |
| 23012 | STK38L   | serine/threonine kinase 38 like                                              | 1.071 | 1.512 | 1.517 |
| 23031 | MAST3    | microtubule associated serine/threonine kinase 3                             | 3.286 | 1.213 | 1.198 |
| 23043 | TNIK     | TRAF2 and NCK interacting kinase                                             | 0.825 | 1.265 | 1.072 |
| 23049 | SMG1     | PI-3-kinase-related kinase SMG-1                                             | 1.696 | 1.211 | 1.696 |
| 23097 | CDC2L6   | cell division cycle 2-like 6 (CDK8-like)                                     | 1.118 | 2.174 | 2.45  |
| 23139 | MAST2    | microtubule associated serine/threonine kinase 2                             | 1.408 | 0.794 | 1.386 |
| 23178 | PASK     | PAS domain containing serine/threonine kinase                                | 1.203 | 1.194 | 1.338 |
| 23227 | MAST4    | microtubule associated serine/threonine kinase family member 4               | 2.204 | 0.838 | 1.067 |
| 23235 | SNF1LK2  | SNF1-like kinase 2                                                           | 2.56  | 1.879 | 1.47  |
| 23387 | KIAA0999 | KIAA0999 protein                                                             | 0.873 | 1.264 | 1.196 |
| 23396 | PIP5K1C  | phosphatidylinositol-4-phosphate 5-kinase, type I, gamma                     | 1.025 | 1.158 | 0.809 |
| 23476 | BRD4     | bromodomain containing 4                                                     | 1.232 | 1.254 | 0.844 |
| 23552 | CCRK     | cell cycle related kinase                                                    | 2.153 | 1.952 | 1.558 |

|       |         |                                                                              |       |       |       |
|-------|---------|------------------------------------------------------------------------------|-------|-------|-------|
| 23604 | DAPK2   | death-associated protein kinase 2                                            | 1.21  | 1.952 | 1.231 |
| 23617 | TSSK2   | testis-specific serine kinase 2                                              | 0.944 | 2.032 | 1.604 |
| 23678 | SGKL    | serum/glucocorticoid regulated kinase-like                                   | 0.798 | 1.082 | 1.09  |
| 23683 | PRKD3   | protein kinase D3                                                            | 0.679 | 0.996 | 0.652 |
| 25778 | RIPK5   | receptor interacting protein kinase 5                                        | 1.623 | 0.897 | 1.081 |
| 25865 | PRKD2   | protein kinase D2                                                            | 1.108 | 1.194 | 1.082 |
| 25989 | ULK3    | unc-51-like kinase 3 (C. elegans)                                            | 1.755 | 1.888 | 1.44  |
| 26289 | AK5     | adenylate kinase 5                                                           | 2.113 | 0.512 | 0.871 |
| 26353 | HSPB8   | heat shock 22kDa protein 8                                                   | 1.761 | 0.817 | 1.669 |
| 26524 | LATS2   | LATS, large tumor suppressor, homolog 2 (Drosophila)                         | 1.373 | 1.2   | 1.495 |
| 26576 | STK23   | serine/threonine kinase 23                                                   | 0.545 | 1.213 | 1.169 |
| 26750 | RPS6KC1 | ribosomal protein S6 kinase, 52kDa, polypeptide 1                            | 0.821 | 1.17  | 1.001 |
| 27010 | TPK1    | thiamin pyrophosphokinase 1                                                  | 2.879 | 0.771 | 0.98  |
| 27102 | EIF2AK1 | eukaryotic translation initiation factor 2-alpha kinase 1                    | 0.93  | 1.28  | 1.27  |
| 27148 | STK36   | serine/threonine kinase 36 (fused homolog, Drosophila)                       | 0.759 | 1.686 | 1.189 |
| 27330 | RPS6KA6 | ribosomal protein S6 kinase, 90kDa, polypeptide 6                            | 1.492 | 1.109 | 1.21  |
| 27347 | STK39   | serine threonine kinase 39 (STE20/SPS1 homolog, yeast)                       | 0.246 | 1.05  | 1.156 |
| 28951 | TRIB2   | tribbles homolog 2 (Drosophila)                                              | 0.703 | 0.852 | 0.504 |
| 28996 | HIPK2   | homeodomain interacting protein kinase 2                                     | 1.244 | 7.497 | 2.306 |
| 29110 | TBK1    | TANK-binding kinase 1                                                        | 0.661 | 0.943 | 1.462 |
| 29904 | EEF2K   | eukaryotic elongation factor-2 kinase                                        | 1.669 | 1.841 | 1.884 |
| 29922 | NME7    | non-metastatic cells 7, protein expressed in (nucleoside-diphosphate kinase) | 1.486 | 0.587 | 0.879 |
| 29941 | PKN3    | protein kinase N3                                                            | 1.448 | 2.247 | 3.586 |
| 29959 | NRBP    | nuclear receptor binding protein                                             | 0.758 | 1.94  | 2.383 |
| 30811 | HUNK    | hormonally upregulated Neu-associated kinase                                 | 1.809 | 1.614 | 1.432 |
| 30849 | PIK3R4  | phosphoinositide-3-kinase, regulatory subunit 4, p150                        | 1.675 | 1.265 | 3.436 |
| 50488 | MINK1   | misshapen-like kinase 1 (zebrafish)                                          | 0.738 | 0.917 | 1.058 |
| 50808 | AK3L1   | adenylate kinase 3 like 1                                                    | 1.328 | 0.549 | 0.98  |
| 51086 | TNNI3K  | TNNI3 interacting kinase                                                     | 1.453 | 1.367 | 1.745 |
| 51135 | IRAK4   | interleukin-1 receptor-associated kinase 4                                   | 0.598 | 0.922 | 1.185 |
| 51231 | VRK3    | vaccinia related kinase 3                                                    | 1.652 | 2.368 | 2.797 |
| 51265 | CDKL3   | cyclin-dependent kinase-like 3                                               | 1.385 | 1.516 | 1.425 |
| 51347 | TAOK3   | TAO kinase 3                                                                 | 0.298 | 1.097 | 0.939 |
| 51592 | TRIM33  | tripartite motif-containing 33                                               | 1.109 | 0.866 | 0.824 |
| 51701 | NLK     | nemo like kinase                                                             | 1.422 | 0.834 | 1.356 |
| 51727 | CMPK    | UMP-CMP kinase                                                               | 0.592 | 0.47  | 0.842 |
| 51755 | CRK7    | CDC2-related protein kinase 7                                                | 1.82  | 1.203 | 1.582 |
| 51765 | MASK    | Mst3 and SOK1-related kinase                                                 | 1.573 | 1.54  | 1.793 |
| 51776 | ZAK     | sterile alpha motif and leucine zipper containing kinase AZK                 | 1.108 | 1.969 | 1.822 |
| 53354 | PANK1   | pantothenate kinase 1                                                        | 1.058 | 1.375 | 0.727 |
| 53834 | FGFRL1  | fibroblast growth factor receptor-like 1                                     | 0.992 | 0.913 | 0.942 |
| 53904 | MYO3A   | myosin IIIA                                                                  | 2.375 | 1.04  | 1.093 |
| 53944 | CSNK1G1 | casein kinase 1, gamma 1                                                     | 2.12  | 3.662 | 2.259 |
| 54101 | RIPK4   | receptor-interacting serine-threonine kinase 4                               | 1.791 | 1.2   | 1.415 |
| 54822 | TRPM7   | transient receptor potential cation channel, subfamily M, member 7           | 0.852 | 1.64  | 1.504 |
| 54861 | SNRK    | SNF related kinase                                                           | 1.655 | 1.485 | 1.604 |
| 54899 | PXK     | PX domain containing serine/threonine kinase                                 | 1.388 | 0.633 | 0.758 |
| 54963 | UCKL1   | uridine-cytidine kinase 1-like 1                                             | 0.993 | 1.027 | 0.643 |
| 54986 | ULK4    | unc-51-like kinase 4 (C. elegans)                                            | 0.843 | 0.803 | 0.687 |
| 55224 | ETNK2   | ethanolamine kinase 2                                                        | 0.994 | 0.867 | 0.822 |
| 55229 | PANK4   | pantothenate kinase 4                                                        | 1.336 | 1.065 | 0.61  |

|       |          |                                                                           |       |       |       |
|-------|----------|---------------------------------------------------------------------------|-------|-------|-------|
| 55300 | PI4K2B   | phosphatidylinositol 4-kinase type-II beta                                | 1.492 | 0.719 | 1.012 |
| 55312 | RFK      | riboflavin kinase                                                         | 1.071 | 1.107 | 0.694 |
| 55351 | STK32B   | serine/threonine kinase 32B                                               | 0.859 | 0.795 | 0.975 |
| 55359 | STYK1    | serine/threonine/tyrosine kinase 1                                        | 1.593 | 2.569 | 1.418 |
| 55361 | PI4KII   | phosphatidylinositol 4-kinase type II                                     | 0.942 | 1.005 | 0.745 |
| 55437 | ALS2CR2  | amyotrophic lateral sclerosis 2 (juvenile) chromosome region, candidate 2 | 2.371 | 0.816 | 1.533 |
| 55500 | ETNK1    | ethanolamine kinase 1                                                     | 0.887 | 1.212 | 0.946 |
| 55561 | CDC42BPG | CDC42 binding protein kinase gamma (DMPK-like)                            | 1.921 | 0.983 | 0.846 |
| 55577 | NAGK     | N-acetylglucosamine kinase                                                | 1.228 | 0.894 | 0.707 |
| 55589 | BMP2K    | BMP2 inducible kinase                                                     | 1.258 | 0.681 | 0.71  |
| 55681 | SCYL2    | SCY1-like 2 ( <i>S. cerevisiae</i> )                                      | 2.873 | 1.328 | 2.419 |
| 55750 | MULK     | multiple substrate lipid kinase                                           | 0.643 | 1.04  | 0.921 |
| 55781 | RIOK2    | RIO kinase 2 (yeast)                                                      | 0.994 | 1.133 | 0.677 |
| 55872 | PBK      | PDZ binding kinase                                                        | 0.933 | 0.659 | 0.75  |
| 56155 | TEX14    | testis expressed sequence 14                                              | 1.205 | 1.294 | 1.072 |
| 56164 | STK31    | serine/threonine kinase 31                                                | 0.8   | 1.076 | 1.141 |
| 56848 | SPHK2    | sphingosine kinase 2                                                      | 0.659 | 0.978 | 0.914 |
| 56924 | PAK6     | p21(CDKN1A)-activated kinase 6                                            | 1.107 | 0.728 | 1.362 |
| 56997 | CABC1    | chaperone, ABC1 activity of bc1 complex like ( <i>S. pombe</i> )          | 0.98  | 2.821 | 3.202 |
| 57118 | CAMK1D   | calcium/calmodulin-dependent protein kinase ID                            | 0.488 | 0.805 | 0.554 |
| 57143 | ADCK1    | aarF domain containing kinase 1                                           | 0.592 | 0.81  | 0.739 |
| 57144 | PAK7     | p21(CDKN1A)-activated kinase 7                                            | 1.774 | 1.599 | 1.505 |
| 57147 | PACE-1   | ezrin-binding partner PACE-1                                              | 1.079 | 1.086 | 1.192 |
| 57172 | CAMK1G   | calcium/calmodulin-dependent protein kinase IG                            | 1.341 | 0.95  | 1.145 |
| 57396 | CLK4     | CDC-like kinase 4                                                         | 1.355 | 0.711 | 1.27  |
| 57410 | SCYL1    | SCY1-like 1 ( <i>S. cerevisiae</i> )                                      | 1.361 | 1.236 | 1.293 |
| 57538 | ALPK3    | alpha-kinase 3                                                            | 1.513 | 1.709 | 1.36  |
| 57551 | TAOK1    | TAO kinase 1                                                              | 1.063 | 1.558 | 1.573 |
| 57761 | TRIB3    | tribbles homolog 3 ( <i>Drosophila</i> )                                  | 1.358 | 1.04  | 1.252 |
| 57787 | MARK4    | MAP/microtubule affinity-regulating kinase 4                              | 1.619 | 0.918 | 1.165 |
| 64080 | RBKS     | ribokinase                                                                | 0.662 | 0.854 | 0.554 |
| 64122 | FN3K     | fructosamine 3 kinase                                                     | 0.805 | 0.998 | 0.89  |
| 64781 | CERK     | ceramide kinase                                                           | 1.023 | 1.137 | 0.697 |
| 65018 | PINK1    | PTEN induced putative kinase 1                                            | 2.328 | 1.388 | 2.528 |
| 65061 | ALS2CR7  | amyotrophic lateral sclerosis 2 (juvenile) chromosome region, candidate 7 | 0.985 | 1.09  | 0.97  |
| 65125 | WNK1     | WNK lysine deficient protein kinase 1                                     | 0.703 | 1.108 | 1.406 |
| 65220 | NADK     | NAD kinase                                                                | 2.086 | 1.052 | 1.452 |
| 65266 | WNK4     | WNK lysine deficient protein kinase 4                                     | 1.87  | 2.083 | 1.745 |
| 65267 | WNK3     | WNK lysine deficient protein kinase 3                                     | 0.839 | 1.523 | 1.362 |
| 65268 | WNK2     | WNK lysine deficient protein kinase 2                                     | 1.902 | 1.104 | 1.157 |
| 65975 | STK33    | serine/threonine kinase 33                                                | 1.198 | 1.208 | 1.179 |
| 79012 | CAMKV    | CaM kinase-like vesicle-associated                                        | 2.087 | 1.539 | 1.282 |
| 79646 | PANK3    | pantothenate kinase 3                                                     | 0.705 | 0.982 | 1.302 |
| 79705 | LRRK1    | leucine-rich repeat kinase 1                                              | 1.849 | 1.217 | 1.508 |
| 79834 | 0        | KIAA2002 protein                                                          | 0.857 | 0.983 | 1.391 |
| 79837 | PIP5K2C  | phosphatidylinositol-4-phosphate 5-kinase, type II, gamma                 | 1.151 | 1.594 | 0.769 |
| 79858 | NEK11    | NIMA (never in mitosis gene a)- related kinase 11                         | 1.015 | 1.31  | 0.768 |
| 79934 | ADCK4    | aarF domain containing kinase 4                                           | 1.753 | 1.389 | 1.157 |
| 80025 | PANK2    | pantothenate kinase 2 (Hallervorden-Spatz syndrome)                       | 1.201 | 1.303 | 1.217 |
| 80122 | YSK4     | Yeast Sps1/Ste20-related kinase 4 ( <i>S. cerevisiae</i> )                | 1.873 | 1.007 | 1.21  |
| 80216 | ALPK1    | alpha-kinase 1                                                            | 1.641 | 1.269 | 1.658 |

|        |          |                                                                    |       |       |       |
|--------|----------|--------------------------------------------------------------------|-------|-------|-------|
| 80271  | ITPKC    | inositol 1,4,5-trisphosphate 3-kinase C                            | 0.66  | 1.18  | 0.873 |
| 80347  | COASY    | Coenzyme A synthase                                                | 0.935 | 1.126 | 0.953 |
| 81629  | STK22C   | serine/threonine kinase 22C (spermiogenesis associated)            | 0.964 | 0.883 | 0.507 |
| 81788  | SNARK    | likely ortholog of rat SNF1/AMP-activated protein kinase           | 0.969 | 0.896 | 0.84  |
| 83440  | ADPGK    | ADP-dependent glucokinase                                          | 0.473 | 0.749 | 0.616 |
| 83549  | UCK1     | uridine-cytidine kinase 1                                          | 0.641 | 0.769 | 1.14  |
| 83694  | RPS6KL1  | ribosomal protein S6 kinase-like 1                                 | 1.728 | 1.314 | 1.422 |
| 83732  | RIOK1    | RIO kinase 1 (yeast)                                               | 1.148 | 1.048 | 1.171 |
| 83903  | GSG2     | germ cell associated 2 (haspin)                                    | 0.906 | 1.422 | 1.544 |
| 83931  | STK40    | serine/threonine kinase 40                                         | 1.757 | 1.258 | 1.422 |
| 83983  | SSTK     | serine/threonine protein kinase SSTK                               | 1.554 | 0.727 | 0.82  |
| 84197  | 0        | hypothetical protein FLJ23356                                      | 1.056 | 1.598 | 1.449 |
| 84254  | CAMKK1   | calcium/calmodulin-dependent protein kinase kinase 1, alpha        | 1.466 | 0.661 | 0.997 |
| 84446  | BRSK1    | BR serine/threonine kinase 1                                       | 0.754 | 0.955 | 1.255 |
| 84451  | KIAA1804 | mixed lineage kinase 4                                             | 1.491 | 1.347 | 1.669 |
| 84630  | TTBK1    | tau tubulin kinase 1                                               | 1.078 | 0.912 | 1.19  |
| 84930  | MASTL    | microtubule associated serine/threonine kinase-like                | 1.494 | 1.121 | 1.021 |
| 85366  | MYLK2    | myosin light chain kinase 2, skeletal muscle                       | 1.35  | 1.92  | 1.073 |
| 85443  | DCAMKL3  | doublecortin and CaM kinase-like 3                                 | 1.152 | 0.98  | 1.014 |
| 85481  | PSKH2    | protein serine kinase H2                                           | 0.917 | 2.357 | 2.653 |
| 90956  | ADCK2    | aarF domain containing kinase 2                                    | 0.813 | 1.096 | 0.38  |
| 91461  | 0        | hypothetical protein BC007901                                      | 0.443 | 0.95  | 0.93  |
| 91754  | NEK9     | NIMA (never in mitosis gene a)- related kinase 9                   | 1.525 | 1.565 | 1.292 |
| 91807  | MLCK     | cardiac-MyBP-C associated Ca/CaM kinase                            | 2.204 | 0.996 | 1.618 |
| 92335  | LYK5     | protein kinase LYK5                                                | 0.686 | 1.088 | 1.094 |
| 93627  | MGC16169 | hypothetical protein MGC16169                                      | 0.948 | 1.131 | 1.036 |
| 112858 | TP53RK   | TP53 regulating kinase                                             | 1.488 | 1.73  | 1.196 |
| 114783 | LMTK3    | lemur tyrosine kinase 3                                            | 1.282 | 1.134 | 1.202 |
| 115701 | ALPK2    | alpha-kinase 2                                                     | 0.893 | 0.98  | 0.903 |
| 117283 | IHPK3    | inositol hexaphosphate kinase 3                                    | 0.961 | 0.585 | 0.778 |
| 120892 | LRRK2    | leucine-rich repeat kinase 2                                       | 0.557 | 1.262 | 1.002 |
| 122011 | CSNK1A1L | casein kinase 1, alpha 1-like                                      | 2.317 | 2.077 | 1.487 |
| 122481 | AK7      | adenylate kinase 7                                                 | 1.272 | 0.725 | 0.943 |
| 124923 | FLJ25006 | hypothetical protein FLJ25006                                      | 0.529 | 0.804 | 1.381 |
| 127933 | UHMK1    | U2AF homology motif (UHM) kinase 1                                 | 2.593 | 2.563 | 2.734 |
| 130399 | ACVR1C   | activin A receptor, type IC                                        | 1.532 | 1.728 | 1.34  |
| 131890 | GRK7     | G protein-coupled receptor kinase 7                                | 1.051 | 1.278 | 0.95  |
| 138429 | PIP5KL1  | phosphatidylinositol-4-phosphate 5-kinase-like 1                   | 0.674 | 0.645 | 0.888 |
| 140469 | MYO3B    | myosin IIIB                                                        | 1.272 | 1.143 | 1.933 |
| 140609 | NEK7     | NIMA (never in mitosis gene a)-related kinase 7                    | 1.156 | 1.49  | 1.663 |
| 140803 | TRPM6    | transient receptor potential cation channel, subfamily M, member 6 | 1.546 | 1.214 | 1.188 |
| 140901 | STK35    | serine/threonine kinase 35                                         | 1.856 | 1.168 | 2.581 |
| 146057 | TTBK2    | tau tubulin kinase 2                                               | 1.207 | 0.804 | 0.99  |
| 147746 | HIPK4    | homeodomain interacting protein kinase 4                           | 1.706 | 2.184 | 2.087 |
| 149420 | PDIK1L   | PDLIM1 interacting kinase 1 like                                   | 0.582 | 1.49  | 1.368 |
| 150094 | SNF1LK   | SNF1-like kinase                                                   | 1.052 | 1.487 | 1.543 |
| 152110 | FLJ32685 | hypothetical protein FLJ32685                                      | 0.683 | 1.418 | 0.479 |
| 157285 | 0        | hypothetical protein DKFZp761P0423                                 | 0.413 | 0.838 | 0.89  |
| 160851 | DGKH     | diacylglycerol kinase, eta                                         | 1.309 | 0.454 | 0.819 |
| 162417 | NAGS     | N-acetylglutamate synthase                                         | 2.262 | 0.634 | 1.148 |
| 166614 | DCAMKL2  | doublecortin and CaM kinase-like 2                                 | 0.664 | 1.211 | 1.4   |

|        |          |                                                                                 |       |       |       |
|--------|----------|---------------------------------------------------------------------------------|-------|-------|-------|
| 167359 | MGC42105 | hypothetical protein MGC42105                                                   | 1.319 | 1.105 | 1.478 |
| 169436 | C9orf96  | chromosome 9 open reading frame 96                                              | 1.942 | 1.322 | 1.57  |
| 197258 | FUK      | fucokinase                                                                      | 1.232 | 0.681 | 0.836 |
| 197259 | MLKL     | mixed lineage kinase domain-like                                                | 0.732 | 0.908 | 0.987 |
| 200576 | PIP5K3   | phosphatidylinositol-3-phosphate/phosphatidylinositol 5-kinase, type III        | 1.032 | 0.442 | 0.811 |
| 202374 | STK32A   | serine/threonine kinase 32A                                                     | 1.518 | 0.697 | 0.866 |
| 203054 | ADCK5    | aarF domain containing kinase 5                                                 | 1.357 | 0.986 | 0.501 |
| 203447 | NRK      | Nik related kinase                                                              | 1.471 | 1.635 | 1.785 |
| 204851 | HIPK1    | homeodomain interacting protein kinase 1                                        | 0.726 | 1.043 | 0.559 |
| 253430 | IPMK     | inositol polyphosphate multikinase                                              | 1.858 | 0.531 | 0.719 |
| 255239 | ANKK1    | ankyrin repeat and kinase domain containing 1                                   | 1.736 | 1.773 | 0.781 |
| 260425 | MAGI3    | membrane-associated guanylate kinase-related (MAGI-3)                           | 0.662 | 0.649 | 0.683 |
| 282974 | STK32C   | serine/threonine kinase 32C                                                     | 1.384 | 1.17  | 1.058 |
| 283455 | KSR2     | kinase suppressor of ras 2                                                      | 2.644 | 0.673 | 1.288 |
| 283629 | TSSK4    | testis-specific serine kinase 4                                                 | 0.816 | 1.261 | 1.27  |
| 284086 | NEK8     | NIMA (never in mitosis gene a)- related kinase 8                                | 1.321 | 2.317 | 1.576 |
| 284656 | EPHA10   | EPH receptor A10                                                                | 0.632 | 0.859 | 1.117 |
| 340156 | 0        | hypothetical protein LOC340156                                                  | 2.822 | 0.815 | 1.083 |
| 340371 | NRBP2    | nuclear receptor binding protein 2                                              | 1.686 | 1.014 | 1.014 |
| 341676 | NEK5     | similar to Serine/threonine-protein kinase Nek1 (NimA-related protein kinase 1) | 1.229 | 0.733 | 1.115 |
| 344387 | CDKL4    | cyclin-dependent kinase-like 4                                                  | 2.198 | 1.102 | 1.248 |
| 388228 | SBK1     | SH3-binding domain kinase 1                                                     | 1.033 | 0.748 | 0.877 |
| 389840 | MAP3K15  | mitogen-activated protein kinase kinase kinase 15                               | 0.885 | 1.059 | 1.307 |
| 390975 | 0        | similar to protein kinase Bsk146                                                | 1.104 | 0.946 | 0.924 |
| 415116 | PIM3     | pim-3 oncogene                                                                  | 2.251 | 1.583 | 1.949 |
| 440275 | EIF2AK4  | similar to GCN2 eIF2alpha kinase                                                | 0.705 | 1.132 | 0.971 |

Supplementary Table 2. data showing differential usage of nutrients in SRC-3 overexpressing cells from the metabolic phenotypic assay. n=3 plates run from biologically independent experiments; Two-way ANOVA with Sidak's multiple comparison test.

| Metabolites             | Adv. GFP   |                    |       |              |         |         | Adv. SRC-3 |                    |  |              |         |           | Sidak's multiple comparisons test |                    |  |              |         |         |
|-------------------------|------------|--------------------|-------|--------------|---------|---------|------------|--------------------|--|--------------|---------|-----------|-----------------------------------|--------------------|--|--------------|---------|---------|
|                         | Mean Diff. | 95.00% CI of diff. |       | Significant? | Summary | P Value | Mean Diff. | 95.00% CI of diff. |  | Significant? | Summary | P Value   | Mean Diff.                        | 95.00% CI of diff. |  | Significant? | Summary | P Value |
| a-Cyclodextrin          | 18.65      | 14                 | 16.32 | 7.3          | 3.28    | 20.05   | 6.113      | -2.66 to 14.89     |  | No           | ns      | 0.769374  |                                   |                    |  |              |         |         |
| Dextrin                 | 51.16      | 45.27              | 48.63 | 55.29        | 58.37   | 50.5    | -6.367     | -15.14 to 2.407    |  | No           | ns      | 0.670286  |                                   |                    |  |              |         |         |
| Glycogen                | 49.57      | 43.05              | 47.75 | 55.05        | 57.73   | 50.32   | -7.577     | -16.35 to 1.197    |  | No           | ns      | 0.229314  |                                   |                    |  |              |         |         |
| Maltitol                | 54.22      | 49.05              | 52.41 | 58.89        | 59.4    | 46.26   | -2.957     | -11.73 to 5.817    |  | No           | ns      | >0.999999 |                                   |                    |  |              |         |         |
| Maltotriose             | 53.54      | 45.35              | 50.08 | 55.82        | 57.42   | 51.36   | -5.21      | -13.98 to 3.564    |  | No           | ns      | 0.975746  |                                   |                    |  |              |         |         |
| D-Maltose               | 50.8       | 45.24              | 47.81 | 55.72        | 54.11   | 48.1    | -4.693     | -13.47 to 4.08     |  | No           | ns      | 0.997666  |                                   |                    |  |              |         |         |
| Trehalose               | 19.45      | 18.14              | 18.71 | 22.22        | 22.15   | 21.98   | -3.35      | -12.12 to 5.424    |  | No           | ns      | >0.999999 |                                   |                    |  |              |         |         |
| D-Cellobiose            | 18.58      | 16.01              | 19.35 | 18.73        | 19.19   | 19.79   | -1.257     | -10.03 to 7.517    |  | No           | ns      | >0.999999 |                                   |                    |  |              |         |         |
| Gentiobiose             | 15.47      | 14.04              | 15.83 | 17.72        | 18.96   | 17.65   | -2.997     | -11.77 to 5.777    |  | No           | ns      | >0.999999 |                                   |                    |  |              |         |         |
| D-Glucose-6-Phosphate   | 18.85      | 14.56              | 18.64 | 28.52        | 29.49   | 31.92   | -12.63     | -21.4 to -3.853    |  | Yes          | ****    | 0.000077  |                                   |                    |  |              |         |         |
| a-D-Glucose-1-Phosphate | 37.69      | 35.28              | 34.95 | 34.98        | 33.14   | 17.46   | 7.447      | -1.327 to 16.22    |  | No           | ns      | 0.264489  |                                   |                    |  |              |         |         |
| L-Glucose               | 15.12      | 13.69              | 13.87 | 17.22        | 16.5    | 19.45   | -3.497     | -12.27 to 5.277    |  | No           | ns      | >0.999999 |                                   |                    |  |              |         |         |
| a-D-Glucose             | 40.37      | 44.9               | 45.85 | 56.44        | 59.29   | 57.68   | -14.1      | -22.87 to -5.323   |  | Yes          | ****    | 0.000004  |                                   |                    |  |              |         |         |
| a-D-Glucose             | 41.68      | 42.73              | 43.07 | 58.9         | 58.65   | 59.33   | -16.47     | -25.24 to -7.693   |  | Yes          | ****    | <0.000001 |                                   |                    |  |              |         |         |
| a-D-Glucose             | 42.38      | 41.98              | 40.85 | 57.12        | 58.38   | 59.8    | -16.7      | -25.47 to -7.923   |  | Yes          | ****    | <0.000001 |                                   |                    |  |              |         |         |
| 3-O-Methylglucose       | 20.15      | 11.07              | 20.07 | 17.82        | 16.4    | 16.58   | 0.1633     | -8.61 to 8.937     |  | No           | ns      | >0.999999 |                                   |                    |  |              |         |         |
| a-Methyl-D-Glucoside    | 18.31      | 16.57              | 18.38 | 21.13        | 20.96   | 20.4    | -3.077     | -11.85 to 5.697    |  | No           | ns      | >0.999999 |                                   |                    |  |              |         |         |
| b-Methyl-D-Glucoside    | 16.88      | 13.56              | 15.5  | 13.6         | 18.78   | 16.43   | -0.9567    | -9.73 to 7.817     |  | No           | ns      | >0.999999 |                                   |                    |  |              |         |         |
| Salicin                 | 17.93      | 15.04              | 17.42 | 18.37        | 20.31   | 17.24   | -1.843     | -10.62 to 6.93     |  | No           | ns      | >0.999999 |                                   |                    |  |              |         |         |
| D-Sorbitol              | 15.82      | 13.68              | 15.88 | 16.49        | 18.7    | 16.96   | -2.257     | -11.03 to 6.517    |  | No           | ns      | >0.999999 |                                   |                    |  |              |         |         |
| N-Acetyl-D-Glucosamine  | 16.06      | 15.96              | 15.28 | 19.36        | 17.18   | 17.05   | -2.097     | -10.87 to 6.677    |  | No           | ns      | >0.999999 |                                   |                    |  |              |         |         |
| D-Glucosaminic acid     | 17.64      | 17.2               | 12.86 | 17.31        | 13.86   | 19.41   | -0.96      | -9.734 to 7.814    |  | No           | ns      | >0.999999 |                                   |                    |  |              |         |         |
| D-Glucuronic acid       | 14.84      | 14.74              | 17.68 | 18.28        | 17.87   | 15.77   | -1.553     | -10.33 to 7.22     |  | No           | ns      | >0.999999 |                                   |                    |  |              |         |         |
| Chondroitin Sulfate C   | 16.56      | 15.85              | 17.1  | 19.74        | 15.31   | 20.32   | -1.953     | -10.73 to 6.82     |  | No           | ns      | >0.999999 |                                   |                    |  |              |         |         |
| Mannan                  | 18.87      | 19.07              | 18.18 | 19.23        | 19.24   | 19.55   | -0.6333    | -9.407 to 8.14     |  | No           | ns      | >0.999999 |                                   |                    |  |              |         |         |
| D-Mannose               | 22.78      | 18.73              | 24.45 | 31.69        | 30.09   | 29.67   | -8.497     | -17.27 to 0.2771   |  | No           | ns      | 0.073183  |                                   |                    |  |              |         |         |
| a-Methyl-D-Mannoside    | 17.66      | 15.04              | 17.45 | 19.25        | 12.58   | 19.7    | -0.46      | -9.234 to 8.314    |  | No           | ns      | >0.999999 |                                   |                    |  |              |         |         |
| D-Mannitol              | 17.58      | 14.93              | 15.08 | 19.02        | 16.91   | 17.48   | -1.94      | -10.71 to 6.834    |  | No           | ns      | >0.999999 |                                   |                    |  |              |         |         |
| N-Acetyl-D-Mannosamine  | 15.46      | 7.28               | 14.71 | 18.37        | 9.4     | 18.52   | -2.947     | -11.72 to 5.827    |  | No           | ns      | >0.999999 |                                   |                    |  |              |         |         |
| D-Melezitose            | 17.67      | 14.74              | 15.69 | 20.18        | 18.17   | 17.99   | -2.747     | -11.52 to 6.027    |  | No           | ns      | >0.999999 |                                   |                    |  |              |         |         |
| Sucrose                 | 17.02      | 15.77              | 15.92 | 19.85        | 16.99   | 18.48   | -2.203     | -10.98 to 6.57     |  | No           | ns      | >0.999999 |                                   |                    |  |              |         |         |
| Palatinose              | 41.18      | 33.78              | 36.15 | 37.38        | 42.55   | 35.75   | -1.523     | -10.3 to 7.25      |  | No           | ns      | >0.999999 |                                   |                    |  |              |         |         |
| D-(+)-Turanose          | 45.16      | 42.8               | 43.44 | 52.92        | 52.71   | 46.31   | -6.847     | -15.62 to 1.927    |  | No           | ns      | 0.472153  |                                   |                    |  |              |         |         |
| D-Tagatose              | 26.91      | 22.48              | 15.09 | 18.96        | 20.4    | 25.35   | -0.07667   | -8.85 to 8.697     |  | No           | ns      | >0.999999 |                                   |                    |  |              |         |         |
| L-Sorbose               | 19.96      | 14.04              | 16.29 | 17.95        | 12.91   | 20.17   | -0.2467    | -9.02 to 8.527     |  | No           | ns      | >0.999999 |                                   |                    |  |              |         |         |
| L-Rhamnose              | 15.69      | 13.52              | 13.63 | 16.65        | 14.6    | 17.85   | -2.087     | -10.86 to 6.687    |  | No           | ns      | >0.999999 |                                   |                    |  |              |         |         |
| L-Fucose                | 17.56      | 15.13              | 14.78 | 16.4         | 15.94   | 17.2    | -0.69      | -9.464 to 8.084    |  | No           | ns      | >0.999999 |                                   |                    |  |              |         |         |
| D-Fucose                | 17.83      | 15.02              | 15.85 | 18.97        | 12.76   | 19.41   | -0.8133    | -9.587 to 7.96     |  | No           | ns      | >0.999999 |                                   |                    |  |              |         |         |
| D-Fructose-6-Phosphate  | 30.73      | 31.32              | 31.5  | 31.82        | 30.15   | 31.19   | 0.13       | -8.644 to 8.904    |  | No           | ns      | >0.999999 |                                   |                    |  |              |         |         |
| D-Fructose              | 21.6       | 20.91              | 19.89 | 23.5         | 20.45   | 22.45   | -1.333     | -10.11 to 7.44     |  | No           | ns      | >0.999999 |                                   |                    |  |              |         |         |
| Stachyose               | 15.83      | 11.75              | 14.97 | 18.69        | 17.05   | 15.43   | -2.873     | -11.65 to 5.9      |  | No           | ns      | >0.999999 |                                   |                    |  |              |         |         |
| D-Raffinose             | 16.55      | 13.87              | 17.23 | 17.47        | 16.68   | 18.82   | -1.773     | -10.55 to 7        |  | No           | ns      | >0.999999 |                                   |                    |  |              |         |         |
| D-Lactitol              | 14.92      | 14.93              | 16.29 | 17.62        | 15.82   | 15.16   | -0.82      | -9.594 to 7.954    |  | No           | ns      | >0.999999 |                                   |                    |  |              |         |         |
| Lactulose               | 16.68      | 13.97              | 15.38 | 16.49        | 18.03   | 17.52   | -2.003     | -10.78 to 6.77     |  | No           | ns      | >0.999999 |                                   |                    |  |              |         |         |
| a-D-Lactose             | 17.12      | 13.62              | 12.44 | 17.05        | 15.22   | 17.12   | -2.07      | -10.84 to 6.704    |  | No           | ns      | >0.999999 |                                   |                    |  |              |         |         |

|                            |       |       |       |       |       |       |          |                  |     |      |           |
|----------------------------|-------|-------|-------|-------|-------|-------|----------|------------------|-----|------|-----------|
| Melibionnic acid           | 16.52 | 14.34 | 10.96 | 14.37 | 14.2  | 17.38 | -1.377   | -10.15 to 7.397  | No  | ns   | >0.999999 |
| D-Melibiose                | 16.07 | 14.46 | 12.32 | 18.01 | 14.4  | 19.75 | -3.103   | -11.88 to 5.67   | No  | ns   | >0.999999 |
| D-Galactose                | 16.98 | 15.23 | 14.95 | 21.13 | 19.1  | 18.87 | -3.98    | -12.75 to 4.794  | No  | ns   | 0.999988  |
| a-Methyl-D-Galactoside     | 16.91 | 14.39 | 13.56 | 15.1  | 13.81 | 18.14 | -0.73    | -9.504 to 8.044  | No  | ns   | >0.999999 |
| Methyl b-D-Galactoside     | 16.16 | 15.07 | 13.18 | 18.77 | 13.44 | 17.79 | -1.863   | -10.64 to 6.91   | No  | ns   | >0.999999 |
| N-Acetylneuraminic acid    | 16.11 | 16.06 | 8.43  | 19.93 | 15.9  | 19.53 | -4.92    | -13.69 to 3.854  | No  | ns   | 0.992629  |
| Pectin                     | 15.24 | 11.11 | 11.38 | 18.61 | 17.96 | 19.81 | -6.217   | -14.99 to 2.557  | No  | ns   | 0.730268  |
| Sedoheptulosan             | 16.53 | 14.83 | 14.13 | 17.05 | 14.35 | 17.11 | -1.007   | -9.78 to 7.767   | No  | ns   | >0.999999 |
| Thymidine                  | 12.83 | 11.58 | 12.81 | 16.83 | 14.86 | 13.7  | -2.723   | -11.5 to 6.05    | No  | ns   | >0.999999 |
| Uridine                    | 25.71 | 27.63 | 22.54 | 36.98 | 33.05 | 31.11 | -8.42    | -17.19 to 0.3538 | No  | ns   | 0.081101  |
| Adenosine                  | 11.62 | 13.92 | 3.38  | 20.59 | 19.24 | 18.65 | -9.853   | -18.63 to -1.08  | Yes | *    | 0.010013  |
| Inosine                    | 22.99 | 23.45 | 25.16 | 33.67 | 36.49 | 38.99 | -12.52   | -21.29 to -3.743 | Yes | **** | 0.000095  |
| Adonitol                   | 18.8  | 14.47 | 15.69 | 16.68 | 15.48 | 20.82 | -1.34    | -10.11 to 7.434  | No  | ns   | >0.999999 |
| L-Arabinose                | 17.28 | 17.37 | 16.15 | 17.13 | 15.77 | 16.92 | 0.3267   | -8.447 to 9.1    | No  | ns   | >0.999999 |
| D-Arabinose                | 18.51 | 15.53 | 15.38 | 17.02 | 14.79 | 18.85 | -0.4133  | -9.187 to 8.36   | No  | ns   | >0.999999 |
| b-Methyl-D-Xylopyranoside  | 14.15 | 12.85 | 14.21 | 14.73 | 14.16 | 11.89 | 0.1433   | -8.63 to 8.917   | No  | ns   | >0.999999 |
| Xylitol                    | 14.87 | 14.11 | 13.93 | 17.53 | 14.42 | 17.6  | -2.213   | -10.99 to 6.56   | No  | ns   | >0.999999 |
| myo-Inositol               | 16.04 | 15.17 | 15.15 | 20.33 | 16.15 | 6.94  | 0.98     | -7.794 to 9.754  | No  | ns   | >0.999999 |
| i-Erythritol               | 14.6  | 16.18 | 13.82 | 17.64 | 14.02 | 17.21 | -1.423   | -10.2 to 7.35    | No  | ns   | >0.999999 |
| Propylene Glycol           | 14.36 | 13.85 | 13.63 | 17.74 | 15.77 | 7.2   | 0.3767   | -8.397 to 9.15   | No  | ns   | >0.999999 |
| Ethanolamine               | 18.17 | 14.83 | 19.95 | 12.38 | 18.68 | 17.01 | 1.627    | -7.147 to 10.4   | No  | ns   | >0.999999 |
| DL-Glycerol Phosphate      |       | 25.43 | 25.29 | 32.13 | 31.53 | 35.45 | -7.677   | -17.49 to 2.133  | No  | ns   | 0.464389  |
| Glycerol                   | 13.81 | 2.51  | 12.33 | 18.21 | 12.44 | 13.86 | -5.287   | -14.06 to 3.487  | No  | ns   | 0.968258  |
| Citric acid                | 17.8  | 21.04 | 16.66 | 20.52 | 18.17 | 21.6  | -1.597   | -10.37 to 7.177  | No  | ns   | >0.999999 |
| Tricarballic acid          | 17    | 14.83 | 13.5  | 13.55 | 12.44 | 24.04 | -1.567   | -10.34 to 7.207  | No  | ns   | >0.999999 |
| DL-Lactic Acid             |       | 14.79 | 13.96 | 16.9  | 15.52 | 21.2  | -3.498   | -13.31 to 6.311  | No  | ns   | >0.999999 |
| D-Lactic acid Methyl Ester | 16.98 | 14.41 | 15.74 | 15.67 | 14.62 | 20.62 | -1.26    | -10.03 to 7.514  | No  | ns   | >0.999999 |
| Methyl pyruvate            | 14.55 | 14.15 | 14.66 | 15.23 | 14.7  | 2.28  | 3.717    | -5.057 to 12.49  | No  | ns   | >0.999999 |
| Pyruvic acid               | 44.74 | 44.82 | 41.56 | 42.91 | 37.59 | 41.94 | 2.893    | -5.88 to 11.67   | No  | ns   | >0.999999 |
| a-Ketoglutaric acid        | 34    | 36.47 | 34.73 | 35.91 | 31.79 | 35.74 | 0.5867   | -8.187 to 9.36   | No  | ns   | >0.999999 |
| Succinamic acid            | 48.12 | 48.31 | 38.82 | 48.04 | 43.61 | 44.84 | -0.4133  | -9.187 to 8.36   | No  | ns   | >0.999999 |
| Succinic acid              | 15.68 | 13.62 | 15.2  | 19.77 | 16.81 | 20.51 | -4.197   | -12.97 to 4.577  | No  | ns   | 0.999919  |
| Mono-Methylsuccinate       | 31.82 | 25.84 | 32.79 | 40.73 | 37.45 | 36.37 | -8.033   | -16.81 to 0.7405 | No  | ns   | 0.133536  |
| L-Malic acid               | 15.2  | 14.36 | 15.21 | 19.87 | 16.2  | 7.39  | 0.4367   | -8.337 to 9.21   | No  | ns   | >0.999999 |
| D-Malic acid               | 15.63 | 2.75  | 13.16 | 20.07 | 18.43 | 3.09  | -3.35    | -12.12 to 5.424  | No  | ns   | >0.999999 |
| m-Tartaric acid            | 14.84 | 13.03 | 14.51 | 14.17 | 13.81 | 14.53 | -0.04333 | -8.817 to 8.73   | No  | ns   | >0.999999 |
| Lithium acetoacetate       | 20.45 | 15.44 | 17.12 | 10.48 | 12.29 | 20.93 | 3.103    | -5.67 to 11.88   | No  | ns   | >0.999999 |
| g-Amino-N-Butyric acid     | 19.09 | 15.51 | 16.58 | 12.54 | 16.33 | 21.59 | 0.24     | -8.534 to 9.014  | No  | ns   | >0.999999 |
| a-KetoButyric acid         | 30.22 | 31.27 | 29.76 | 25.3  | 8.17  | 28.02 | 9.92     | 1.146 to 18.69   | Yes | **   | 0.009014  |
| a-Hydroxybutyric acid      | 15.16 | 12.88 | 14.99 | 13.87 | 15.31 | 20.91 | -2.353   | -11.13 to 6.42   | No  | ns   | >0.999999 |
| b-Hydroxybutyric acid      | 13.71 | 13.91 | 6.52  | 19.09 | 16.04 | 20.73 | -7.24    | -16.01 to 1.534  | No  | ns   | 0.327976  |
| g-Hydroxybutyric acid      | 16.68 | 15.38 | 14.58 | 17.69 | 6.09  | 21.1  | 0.5867   | -8.187 to 9.36   | No  | ns   | >0.999999 |
| Butyric acid               | 9.18  | 8.14  | 8.89  | 9.76  | 7.54  | 12.59 | -1.227   | -10 to 7.547     | No  | ns   | >0.999999 |
| 23-Butanediol              |       | 11.95 | 15.09 | 13.13 | 15.31 | 7.33  | 1.597    | -8.213 to 11.41  | No  | ns   | >0.999999 |
| 3-Hydroxy-2-butanone       | 13.97 | 12.63 | 14.84 | 15.16 | 14.58 | 16.53 | -1.61    | -10.38 to 7.164  | No  | ns   | >0.999999 |
| Propionic acid             | 15.54 | 13.22 | 13.12 | 13.84 | 16.32 | 15.87 | -1.383   | -10.16 to 7.39   | No  | ns   | >0.999999 |
| Acetic acid                | 16.93 | 3.42  | 11.72 | 15.48 | 14.11 | 14.96 | -4.16    | -12.93 to 4.614  | No  | ns   | 0.99994   |
| Hexanoic acid              | 16.07 | 13.76 | 13.33 | 12.81 | 12.49 | 10.79 | 2.357    | -6.417 to 11.13  | No  | ns   | >0.999999 |

# Supplementary Table 3 Mass Spectrometric Identification of Proteins Present in PFKFB4 Protein Prep.

| Accession  | Description                                                                                                       | Score   | Coverage | # Proteins | # Unique Peptides | # Peptides | # PSMs | # AAs | MW [kDa] | calc. pI |
|------------|-------------------------------------------------------------------------------------------------------------------|---------|----------|------------|-------------------|------------|--------|-------|----------|----------|
| 441610463  | PREDICTED: 6-phosphofructo-2-kinase/fructose-2,6-bisphosphatase 4 isoform X5 [Nomascus leucogenys]                | 1358.57 | 58.39    | 1428       | 1                 | 26         | 214    | 435   | 50.1     | 5.94     |
| 953876539  | PREDICTED: 6-phosphofructo-2-kinase/fructose-2,6-bisphosphatase 4 isoform X5 [Equus caballus]                     | 1344.46 | 57.75    | 1600       | 2                 | 28         | 199    | 445   | 51.2     | 6.05     |
| 884935300  | PREDICTED: 6-phosphofructo-2-kinase/fructose-2,6-bisphosphatase 4 isoform X4 [Cavia porcellus]                    | 1330.28 | 52.87    | 1594       | 0                 | 26         | 223    | 435   | 50.3     | 6.19     |
| 507620286  | PREDICTED: 6-phosphofructo-2-kinase/fructose-2,6-bisphosphatase 4 isoform X2 [Octodon degus]                      | 1308.03 | 46.10    | 1109       | 0                 | 24         | 213    | 462   | 53.3     | 7.18     |
| 1016691066 | PREDICTED: 6-phosphofructo-2-kinase/fructose-2,6-bisphosphatase 4 [Erinaceus europaeus]                           | 1275.06 | 44.14    | 1290       | 0                 | 22         | 212    | 469   | 52.9     | 5.41     |
| 918651007  | PREDICTED: 6-phosphofructo-2-kinase/fructose-2,6-bisphosphatase 4 [Chinchilla lanigera]                           | 1149.31 | 33.59    | 1509       | 0                 | 19         | 164    | 515   | 59.2     | 8.06     |
| 1012173223 | PREDICTED: 6-phosphofructo-2-kinase/fructose-2,6-bisphosphatase 4 isoform X4 [Rousettus aegyptiacus]              | 1136.26 | 57.01    | 1591       | 2                 | 27         | 204    | 435   | 50.3     | 6.05     |
| 637573347  | PREDICTED: 6-phosphofructo-2-kinase/fructose-2,6-bisphosphatase 4 isoform X4 [Callithrix jacchus]                 | 1094.80 | 65.29    | 1631       | 1                 | 28         | 216    | 435   | 50.2     | 6.09     |
| 731464923  | PREDICTED: 6-phosphofructo-2-kinase/fructose-2,6-bisphosphatase 4 isoform X5 [Lissonota africana]                 | 1022.06 | 50.00    | 1418       | 0                 | 22         | 181    | 432   | 49.9     | 5.80     |
| 1008754772 | PREDICTED: 6-phosphofructo-2-kinase/fructose-2,6-bisphosphatase 4 isoform X1 [Peromyscus maniculatus bairdii]     | 994.70  | 42.57    | 1110       | 1                 | 20         | 167    | 451   | 51.9     | 5.67     |
| 634888524  | PREDICTED: 6-phosphofructo-2-kinase/fructose-2,6-bisphosphatase 4 isoform X5 [Dryolotopus afer afer]              | 984.64  | 43.65    | 1412       | 0                 | 21         | 170    | 433   | 49.8     | 6.01     |
| 545533845  | PREDICTED: 6-phosphofructo-2-kinase/fructose-2,6-bisphosphatase 4 isoform X2 [Canis lupus familiaris]             | 982.07  | 55.63    | 1588       | 0                 | 24         | 197    | 435   | 50.4     | 6.14     |
| 752425840  | PREDICTED: 6-phosphofructo-2-kinase/fructose-2,6-bisphosphatase 4 isoform X2 [Alluorhiza melanoleuca]             | 906.16  | 54.02    | 1579       | 1                 | 23         | 153    | 435   | 50.5     | 6.28     |
| 183392329  | 6-phosphofructo-2-kinase/fructose-2,6-bisphosphatase 4 splice isoform 9 [Mus musculus]                            | 855.87  | 44.24    | 960        | 1                 | 17         | 113    | 330   | 38.2     | 5.12     |
| 586486424  | PREDICTED: 6-phosphofructo-2-kinase/fructose-2,6-bisphosphatase 4 isoform X3 [Chrysochloris asiatica]             | 704.39  | 37.34    | 1411       | 0                 | 19         | 153    | 458   | 52.6     | 5.81     |
| 471355905  | PREDICTED: 6-phosphofructo-2-kinase/fructose-2,6-bisphosphatase 4 isoform X3 [Trichoceros manatus latirostris]    | 300.05  | 43.30    | 1513       | 0                 | 19         | 120    | 448   | 51.8     | 5.81     |
| 821469807  | PREDICTED: 6-phosphofructo-2-kinase/fructose-2,6-bisphosphatase 4 isoform X1 [Sarcophilus harrisii]               | 284.53  | 35.92    | 1505       | 1                 | 15         | 112    | 426   | 49.5     | 6.11     |
| 54299283   | 6-phosphofructo-2-kinase/fructose-2,6-bisphosphatase 4 splice isoform 2 bisphosphatase polypeptide [Mus musculus] | 195.23  | 45.42    | 957        | 2                 | 14         | 54     | 251   | 29.0     | 6.28     |
| 675724924  | PREDICTED: keratin, type I cytoskeletal 9, partial [Pan paniscus]                                                 | 177.02  | 29.35    | 30         | 10                | 10         | 16     | 535   | 55.2     | 5.07     |
| 1049402832 | PREDICTED: 6-phosphofructo-2-kinase/fructose-2,6-bisphosphatase 4 isoform X1 [Corvus brachyrhynchos]              | 166.63  | 25.98    | 1381       | 1                 | 12         | 60     | 458   | 52.9     | 6.73     |
| 668728209  | glutathione S-transferase sigma 4 [Spodoptera litura]                                                             | 159.40  | 23.53    | 2          | 4                 | 4          | 8      | 204   | 23.1     | 5.08     |
| 874489449  | PREDICTED: 6-phosphofructo-2-kinase/fructose-2,6-bisphosphatase 4 isoform X1 [Anas platyrhynchos]                 | 155.78  | 24.89    | 1379       | 1                 | 12         | 60     | 474   | 54.7     | 5.85     |
| 426348414  | PREDICTED: keratin, type I cytoskeletal 10 [Gorilla gorilla gorilla]                                              | 152.67  | 20.04    | 842        | 7                 | 8          | 9      | 489   | 51.7     | 5.07     |
| 113015252  | chitinase [Plutella xylostella multiple nucleopolyhedrovirus]                                                     | 144.97  | 16.52    | 119        | 7                 | 7          | 8      | 551   | 61.5     | 5.00     |
| 224038304  | Chain A, Structural Characterization Of An Engineered Allosteric Protein                                          | 142.63  | 33.64    | 114        | 9                 | 9          | 20     | 214   | 25.0     | 6.15     |
| 42632622   | PREDICTED: keratin, type II cytoskeletal 1 [Gorilla gorilla gorilla]                                              | 139.11  | 21.96    | 520        | 6                 | 13         | 18     | 642   | 65.9     | 8.12     |
| 795247621  | PREDICTED: keratin, type I cytoskeletal 16 isoform X1 [Mandrillus leucophaeus]                                    | 138.47  | 9.89     | 764        | 2                 | 5          | 6      | 839   | 92.1     | 4.97     |
| 157113751  | AAEL006582-PA [Aedes aegypti]                                                                                     | 136.43  | 9.52     | 1444       | 7                 | 7          | 9      | 998   | 109.5    | 5.50     |
| 965911305  | PREDICTED: 6-phosphofructo-2-kinase/fructose-2,6-bisphosphatase 1 isoform X5 [Ovis aries musimon]                 | 116.71  | 17.14    | 1020       | 1                 | 7          | 31     | 385   | 44.6     | 5.44     |
| 972973282  | PREDICTED: 6-phosphofructo-2-kinase/fructose-2,6-bisphosphatase 4 isoform X3 [Lepisosteus oculatus]               | 114.91  | 18.85    | 1080       | 1                 | 8          | 33     | 435   | 50.4     | 6.62     |
| 47229094   | unnamed protein product, partial [Tetraodon nigroviridis]                                                         | 110.24  | 11.27    | 724        | 1                 | 4          | 20     | 417   | 48.6     | 6.80     |
| 334303360  | glutathione S-transferase s1 protein [Spodoptera litura]                                                          | 109.35  | 6.97     | 1          | 1                 | 1          | 3      | 201   | 22.9     | 6.23     |
| 230765     | Chain E, Crystal Structure Of An Engineered Subtilisin Inhibitor Complexed With Bovine Trypsin                    | 101.96  | 23.48    | 493        | 3                 | 3          | 6      | 220   | 22.9     | 8.21     |
| 1042294165 | PREDICTED: 6-phosphofructo-2-kinase/fructose-2,6-bisphosphatase-like isoform X3 [Ictalurus punctatus]             | 98.21   | 12.44    | 636        | 1                 | 4          | 20     | 426   | 49.6     | 6.76     |
| 507116798  | heat shock protein 90 cognate [Spodoptera litoralis]                                                              | 97.84   | 10.82    | 147        | 6                 | 6          | 7      | 619   | 71.6     | 5.26     |
| 9627769    | apoptosis inhibitor [Autographa californica nucleopolyhedrovirus]                                                 | 95.00   | 13.99    | 3          | 3                 | 3          | 6      | 286   | 33.3     | 4.83     |
| 435549     | early 49 kDa protein [Autographa californica nucleopolyhedrovirus]                                                | 93.68   | 10.59    | 12         | 4                 | 4          | 4      | 425   | 49.3     | 9.09     |
| 507531701  | PREDICTED: keratin, type II cytoskeletal 1 [Jaculus jaculus]                                                      | 93.19   | 7.36     | 305        | 0                 | 5          | 7      | 625   | 64.5     | 8.02     |
| 146741522  | keratin 16 [Pan troglodytes vers]                                                                                 | 91.44   | 10.41    | 564        | 1                 | 4          | 4      | 461   | 50.2     | 5.00     |
| 334303362  | glutathione S-transferase s2 protein [Spodoptera litura]                                                          | 90.67   | 17.16    | 2          | 3                 | 3          | 3      | 204   | 23.2     | 5.69     |
| 154097382  | ADP/ATP translocase [Heliconius melpomene]                                                                        | 89.14   | 28.67    | 2162       | 7                 | 7          | 10     | 300   | 32.8     | 9.79     |
| 821004410  | PREDICTED: keratin, type II cytoskeletal 2 epidermal isoform X3 [Nomascus leucogenys]                             | 83.14   | 4.98     | 337        | 0                 | 3          | 4      | 623   | 63.9     | 7.20     |
| 397132547  | P24 [Bombyx mandarina nucleopolyhedrovirus S2]                                                                    | 79.26   | 30.77    | 12         | 4                 | 4          | 4      | 195   | 21.8     | 6.92     |
| 829724257  | PREDICTED: keratin, type II cytoskeletal 1 [Microobus murinus]                                                    | 78.83   | 7.40     | 310        | 0                 | 6          | 8      | 649   | 66.1     | 8.24     |
| 657781790  | PREDICTED: 6-phosphofructo-2-kinase/fructose-2,6-bisphosphatase 4 isoform X2 [Cynoglossus semilaevis]             | 75.73   | 13.66    | 800        | 1                 | 7          | 21     | 454   | 52.7     | 5.60     |
| 940377799  | Dmd-like lamin [Spodoptera frugiperda]                                                                            | 75.32   | 4.22     | 1          | 2                 | 2          | 2      | 616   | 70.3     | 6.68     |
| 217071826  | unknown [Medicago truncatula]                                                                                     | 74.36   | 9.85     | 256        | 1                 | 2          | 2      | 406   | 45.2     | 6.35     |
| 21759289   | RecName: Full=60S ribosomal protein L13 [Spodoptera frugiperda]                                                   | 73.70   | 10.50    | 11         | 2                 | 2          | 2      | 219   | 24.9     | 11.49    |
| 397522071  | PREDICTED: keratin, type II cytoskeletal 2 epidermal isoform X3 [Pan paniscus]                                    | 73.33   | 5.63     | 258        | 1                 | 3          | 4      | 639   | 65.5     | 8.00     |
| 114051710  | mitochondrial prohibitin complex protein 2 [Bombyx mori]                                                          | 73.13   | 5.35     | 9          | 1                 | 1          | 1      | 299   | 33.2     | 9.70     |
| 512895401  | PREDICTED: 6-phosphofructo-2-kinase/fructose-2,6-bisphosphatase isoform X4 [Bombyx mori]                          | 72.84   | 3.77     | 341        | 3                 | 4          | 10     | 471   | 54.4     | 6.73     |
| 296322     | unnamed protein product [Autographa californica nucleopolyhedrovirus]                                             | 72.13   | 15.48    | 2          | 1                 | 1          | 1      | 84    | 9.5      | 7.24     |
| 9627817    | AcOrf-74 peptide [Autographa californica nucleopolyhedrovirus]                                                    | 71.28   | 18.49    | 3          | 4                 | 4          | 4      | 265   | 30.5     | 5.12     |
| 831226795  | PREDICTED: keratin, type II cytoskeletal 6A [Otolemur garnettii]                                                  | 71.13   | 9.28     | 550        | 1                 | 4          | 4      | 442   | 47.4     | 8.84     |
| 563854778  | hypothetical protein [Mesorhizobium sp. L48C026A00]                                                               | 69.25   | 8.57     | 58         | 1                 | 1          | 1      | 105   | 11.0     | 10.48    |
| 1495233    | HSC70 [Trichoplusia ni]                                                                                           | 68.92   | 20.98    | 668        | 10                | 12         | 13     | 653   | 71.8     | 5.67     |
| 1043526329 | beta-1-tubulin, partial [Thitarodes armaricanus]                                                                  | 66.97   | 25.29    | 6699       | 1                 | 9          | 13     | 431   | 48.5     | 4.78     |
| 114051313  | chaperonin containing 1-complex polypeptide 1 beta subunit [Bombyx mori]                                          | 66.62   | 2.99     | 1          | 1                 | 1          | 1      | 536   | 57.6     | 6.76     |
| 91902130   | unknown [Plutella xylostella multiple nucleopolyhedrovirus]                                                       | 65.93   | 9.48     | 13         | 3                 | 3          | 4      | 327   | 38.7     | 7.44     |
| 1016158487 | 60S ribosomal protein L23, partial [Dufourea novaeangliae]                                                        | 65.59   | 22.94    | 24         | 2                 | 2          | 2      | 109   | 11.7     | 10.37    |
| 83025072   | uncharacterized protein LOC641565 [Dario rerio]                                                                   | 64.40   | 21.43    | 5341       | 1                 | 7          | 7      | 448   | 50.2     | 4.89     |
| 998523268  | PREDICTED: tubulin beta chain-like [Neodiprion lecontei]                                                          | 64.40   | 10.56    | 3844       | 1                 | 5          | 6      | 445   | 50.0     | 4.89     |
| 1026573754 | Tubulin beta chain, partial [Eufrasia mexicana]                                                                   | 64.29   | 14.99    | 3570       | 1                 | 5          | 6      | 427   | 47.6     | 5.25     |
| 9627778    | nuclear matrix associated phosphoprotein [Autographa californica nucleopolyhedrovirus]                            | 63.07   | 8.73     | 1          | 2                 | 2          | 2      | 275   | 31.3     | 9.55     |
| 23476498   | LEF-3 [Rachiplusia ou MNPV]                                                                                       | 62.81   | 8.05     | 4          | 3                 | 3          | 3      | 385   | 44.5     | 5.24     |
| 914558757  | putative fatty acid synthase, partial [Operophtera brumata]                                                       | 62.14   | 3.07     | 5          | 1                 | 1          | 1      | 358   | 38.4     | 8.27     |
| 607358304  | 26S protease regulatory subunit [Cerapachys biroi]                                                                | 61.16   | 5.53     | 98         | 1                 | 1          | 1      | 235   | 26.0     | 7.99     |
| 671401695  | Bm12665, partial [Brugia malayi]                                                                                  | 60.22   | 30.23    | 651        | 1                 | 1          | 1      | 43    | 4.9      | 9.32     |
| 930653035  | Heat shock 70 kDa protein cognate 3 [Papilio xuthus]                                                              | 60.07   | 8.23     | 13         | 2                 | 4          | 4      | 656   | 72.6     | 5.26     |
| 9627852    | AcOrf-109 peptide [Autographa californica nucleopolyhedrovirus]                                                   | 58.99   | 4.36     | 1          | 1                 | 1          | 1      | 390   | 44.8     | 8.27     |
| 334303364  | glutathione S-transferase s3 protein [Spodoptera litura]                                                          | 58.97   | 4.90     | 1          | 1                 | 1          | 2      | 204   | 23.6     | 5.69     |
| 91982221   | vp80 [Plutella xylostella multiple nucleopolyhedrovirus]                                                          | 58.20   | 4.49     | 7          | 2                 | 2          | 2      | 691   | 79.9     | 5.55     |
| 297613770  | heat shock protein, partial [Actias selene]                                                                       | 57.54   | 15.19    | 23         | 2                 | 2          | 2      | 158   | 17.7     | 7.65     |
| 914559265  | 60S acidic ribosomal protein P1 [Operophtera brumata]                                                             | 57.06   | 14.55    | 14         | 1                 | 1          | 1      | 110   | 11.3     | 4.28     |
| 9627823    | occlusion-derived virus glycoprotein [Autographa californica nucleopolyhedrovirus]                                | 56.15   | 12.96    | 15         | 4                 | 4          | 4      | 409   | 45.4     | 8.03     |
| 332409     | 22.7 kDa protein [Autographa californica nucleopolyhedrovirus]                                                    | 56.05   | 5.37     | 6          | 1                 | 1          | 1      | 205   | 23.8     | 8.32     |
| 23476506   | major capsid protein [Rachiplusia ou MNPV]                                                                        | 55.78   | 3.17     | 3          | 1                 | 1          | 1      | 347   | 39.0     | 6.98     |
| 989615184  | chaperonin, partial [Papilio polytes]                                                                             | 54.55   | 12.07    | 7          | 1                 | 1          | 1      | 116   | 12.5     | 5.95     |
| 1046840413 | truncated FP25K [Autographa californica multiple nucleopolyhedrovirus]                                            | 54.37   | 13.66    | 11         | 2                 | 2          | 2      | 161   | 18.6     | 9.09     |
| 357612498  | chaperonin subunit 4 delta [Danaus plexippus]                                                                     | 53.22   | 3.54     | 1          | 1                 | 1          | 1      | 536   | 56.6     | 7.31     |
| 23476505   | unknown [Rachiplusia ou MNPV]                                                                                     | 53.21   | 6.53     | 14         | 2                 | 2          | 3      | 352   | 40.8     | 7.97     |
| 914558624  | Uncharacterized protein OBRU01_20832 [Operophtera brumata]                                                        | 51.96   | 2.30     | 2          | 1                 | 1          | 1      | 479   | 52.0     | 8.76     |
| 700275750  | AcOrf-81 [Autographa californica nucleopolyhedrovirus]                                                            | 51.70   | 5.91     | 7          | 1                 | 1          | 1      | 220   | 25.5     | 9.03     |
| 11120626   | cationic trypsinogen, partial [Homo sapiens]                                                                      | 50.92   | 11.90    | 67         | 1                 | 1          | 2      | 84    | 9.1      | 9.06     |
| 657809926  | PREDICTED: ATP-dependent RNA helicase DDX3X-like [Cynoglossus semilaevis]                                         | 49.89   | 14.01    | 1439       | 1                 | 1          | 1      | 78    | 8.8      | 4.49     |
| 930651401  | 40S ribosomal protein S18 [Papilio xuthus]                                                                        | 48.09   | 17.07    | 32         | 2                 | 2          | 2      | 123   | 14.3     | 10.30    |
| 22938205   | V-CATH [Bombyx mandarina nucleopolyhedrovirus]                                                                    | 47.69   | 7.12     | 14         | 2                 | 2          | 2      | 323   | 37.0     | 6.67     |
| 113015260  | p94 [Plutella xylostella multiple nucleopolyhedrovirus]                                                           | 47.57   | 1.62     | 4          | 1                 | 1          | 1      | 803   | 94.5     | 6.43     |
| 170067585  | mitochondrial inner membrane protein translocase, 13kD-subunit [Culex quinquefasciatus]                           | 47.24   | 21.21    | 9          | 1                 | 1          | 1      | 66    | 7.4      | 5.36     |
| 27260896   | ribosomal protein S9, partial [Spodoptera frugiperda]                                                             | 46.13   | 12.39    | 1          | 1                 | 1          | 1      | 113   | 12.8     | 10.58    |
| 931580770  | PREDICTED: dermoxidin isoform X2 [Pan paniscus]                                                                   | 44.79   | 10.89    | 9          | 1                 | 1          | 1      | 101   | 10.4     | 7.14     |
| 350536343  | 26S protease regulatory subunit 4 [Taeniopygia guttata]                                                           | 42.68   |          |            |                   |            |        |       |          |          |



# Source data for gels

## Fig. 1e

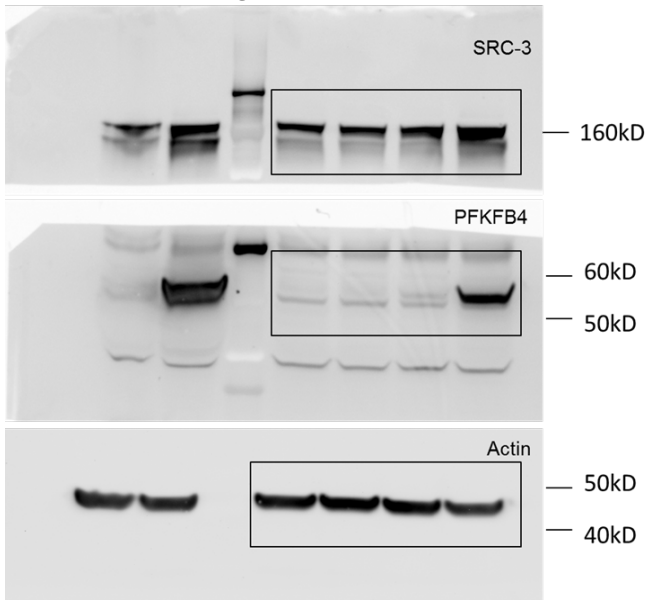

## Fig. 2b

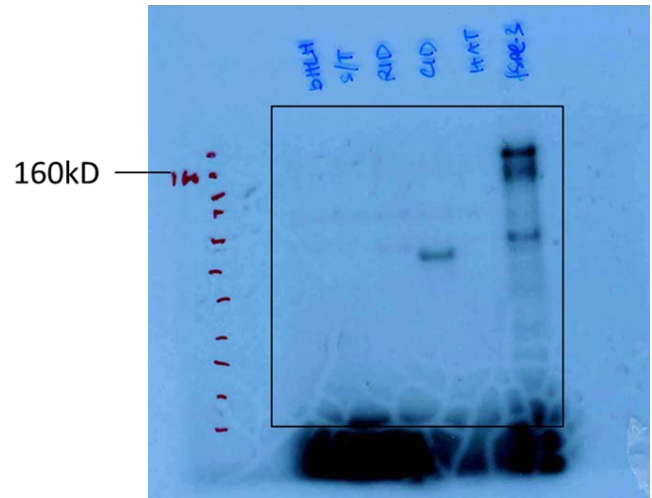

## Fig. 2a

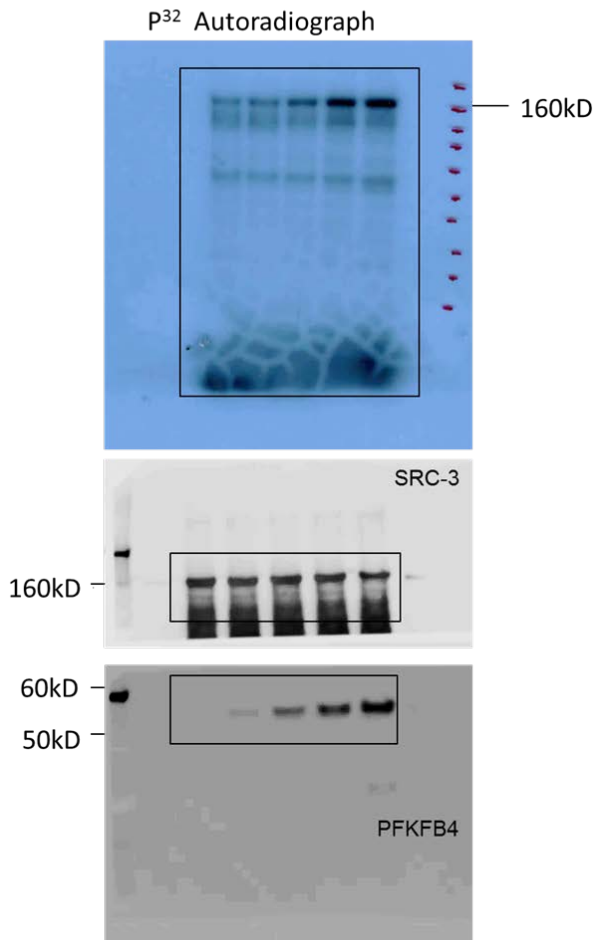

## Fig. 2c

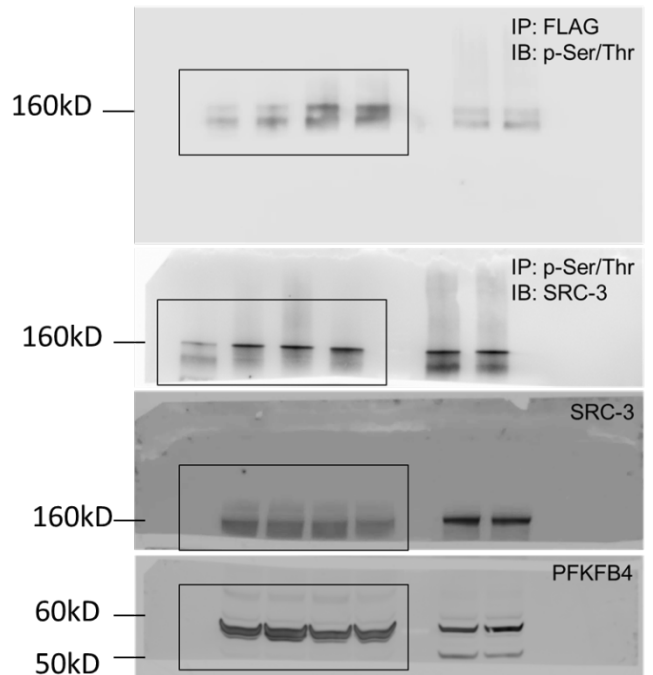

Fig. 2d

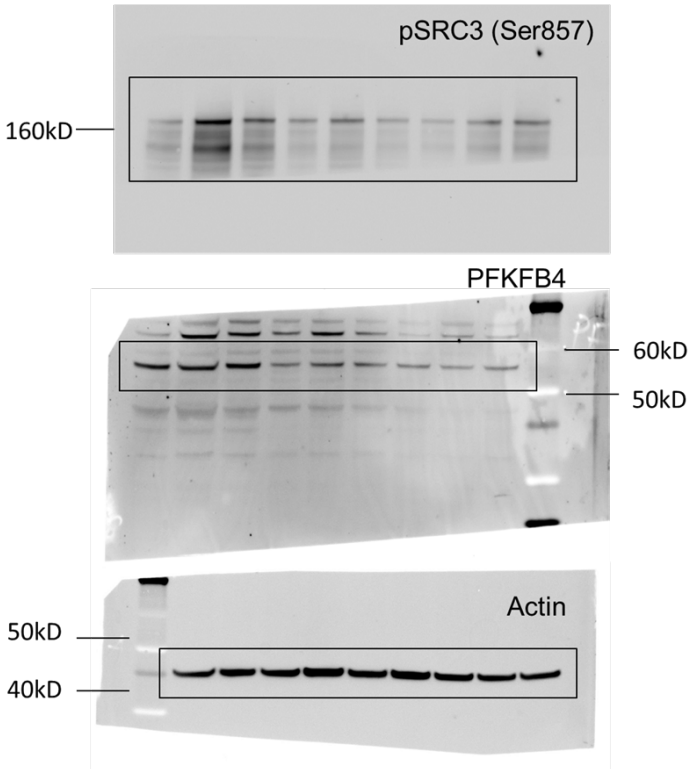

Fig. ED2c

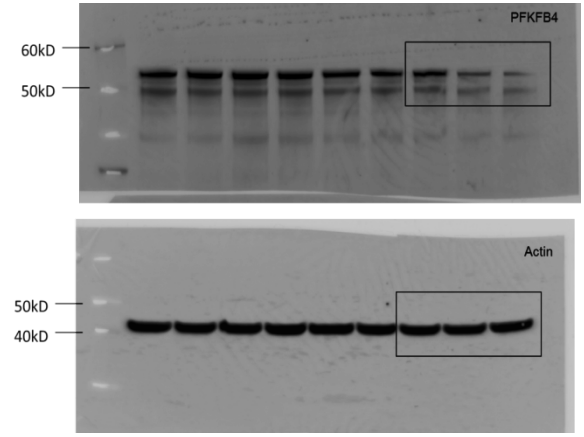

Fig. 3d

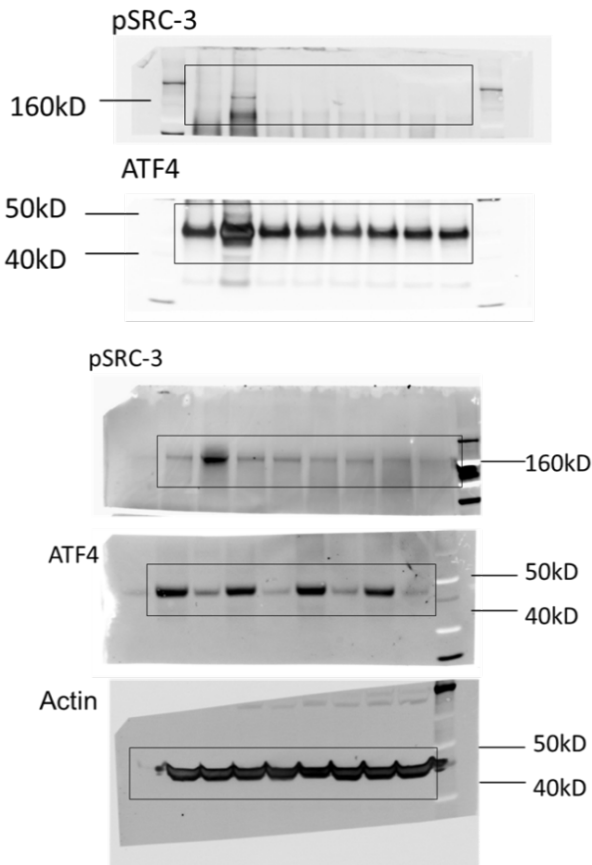

ED 3a

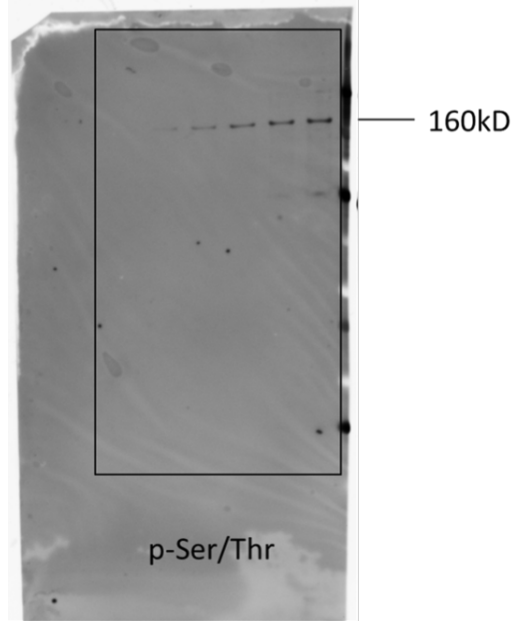

### ED. 3b

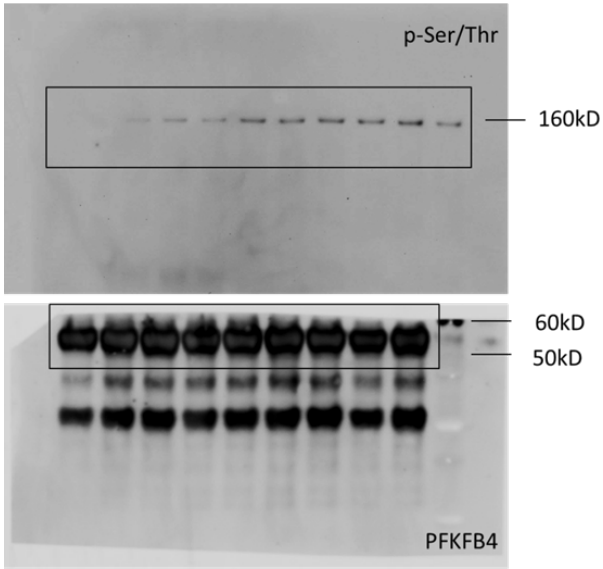

### ED 3h

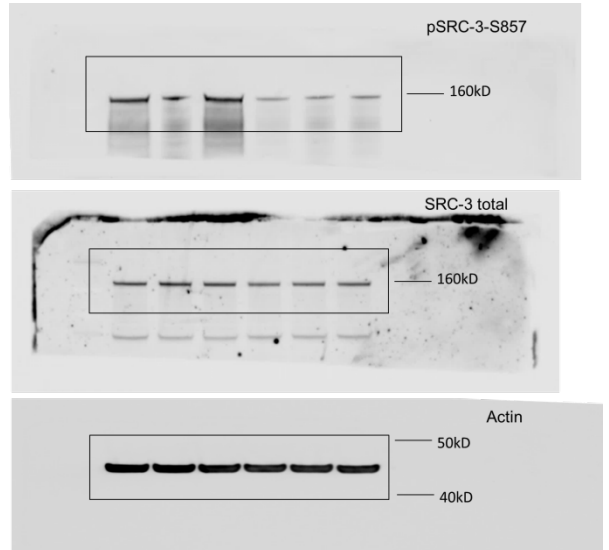

### ED. 3g

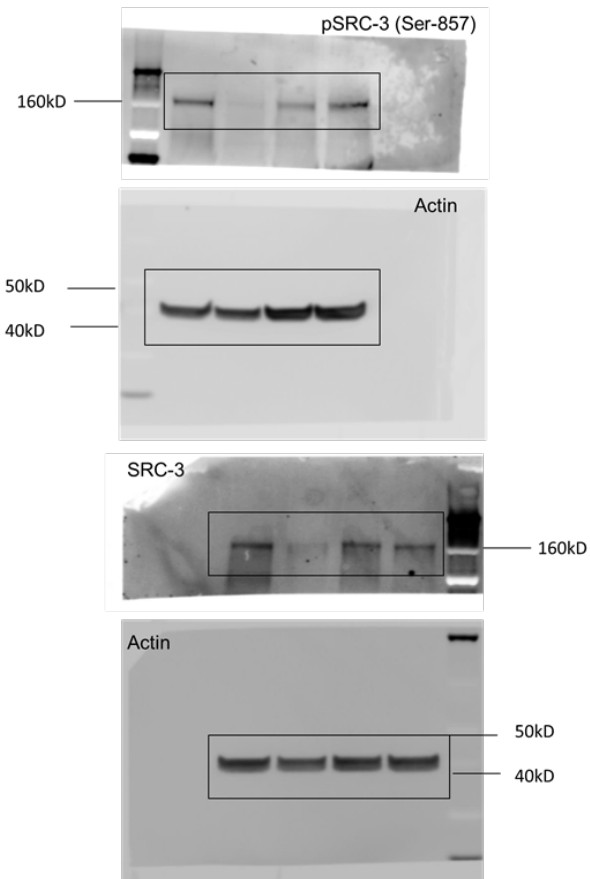

### ED. 4c

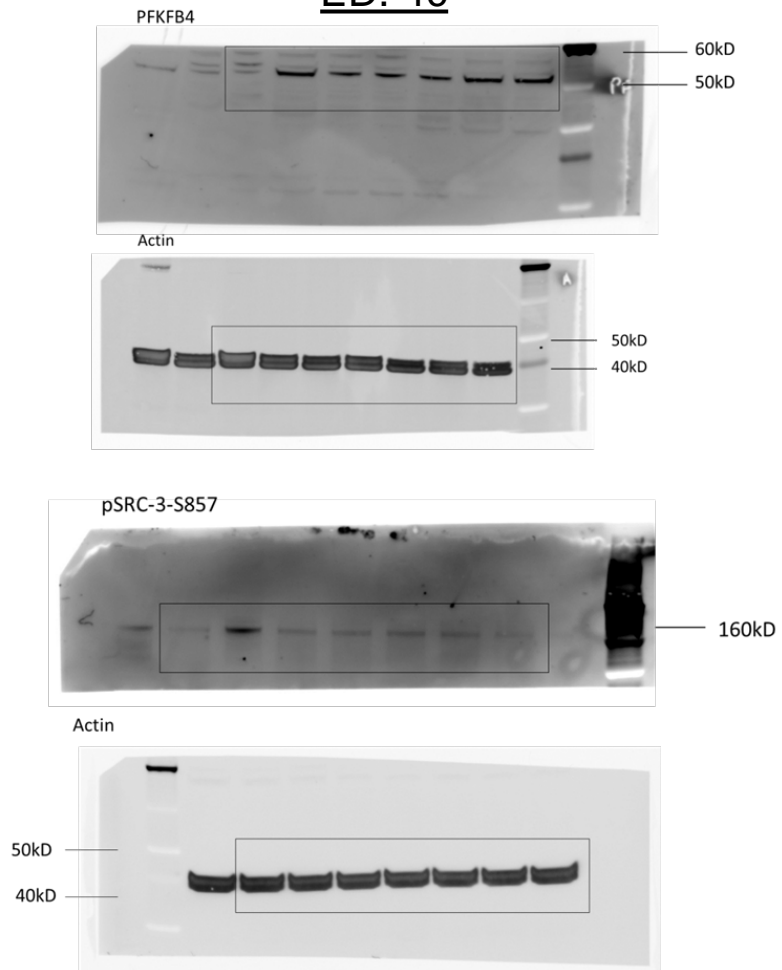

ED. 9e

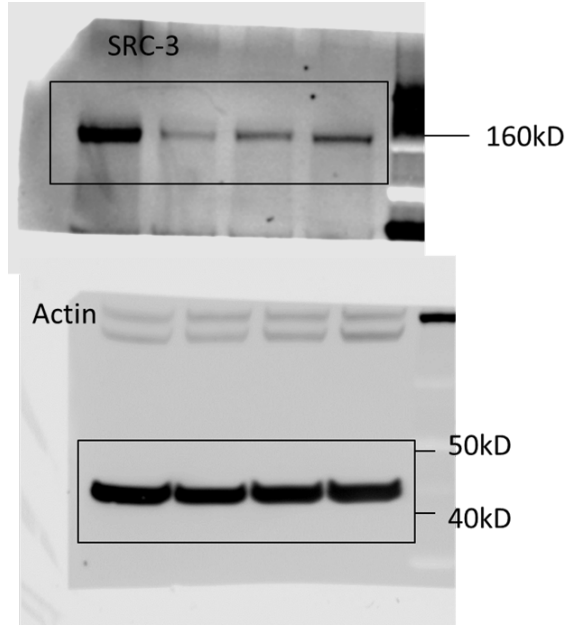

ED. 10a, b

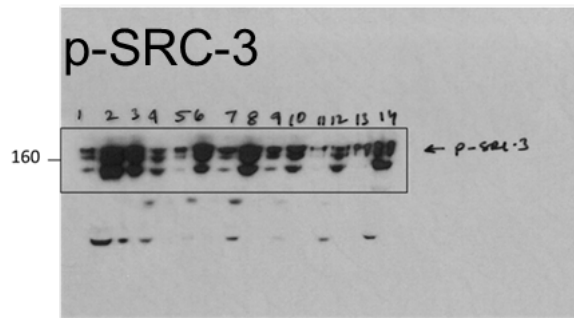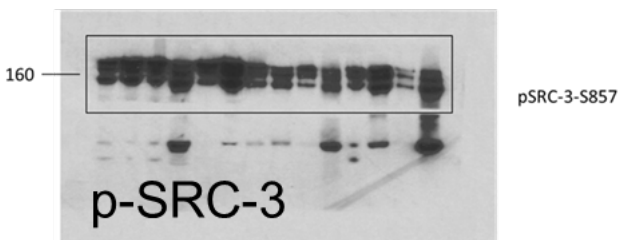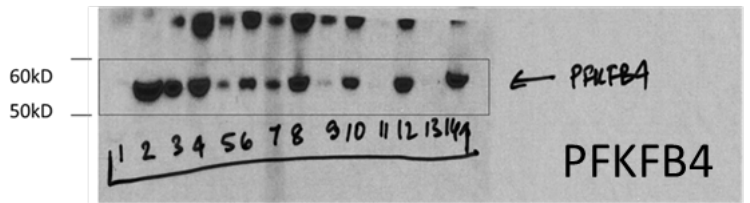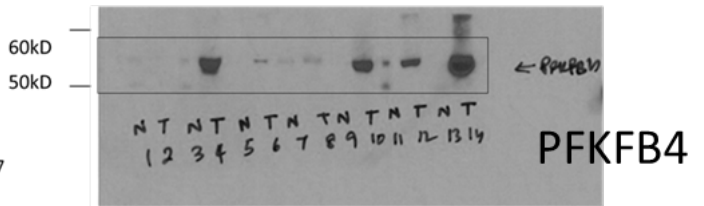

**Total SRC-3**

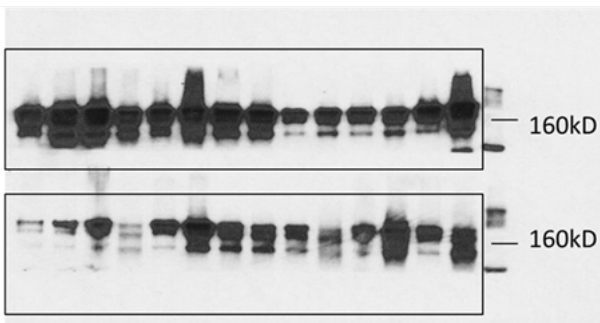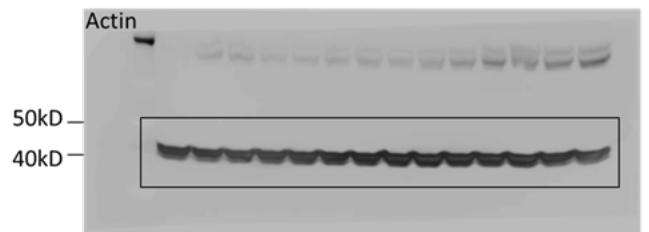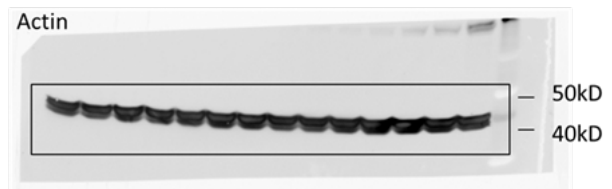

Supplement: NIHMS947216-supplement-Supplementary_Material.pdf [file NIHMS947216-supplement-Supplementary_Material.pdf]
